# Supplementary material for: Promiscuous Lipase-Catalyzed Knoevenagel–Phospha–Michael Reaction for the Synthesis of Antimicrobial β-Phosphono Malonates
Source: MDPI journal article supplement (doi:10.3390/ijms23158819), 2022-08-08
Supplement: s1 [file s1]

## Supplementary Materials

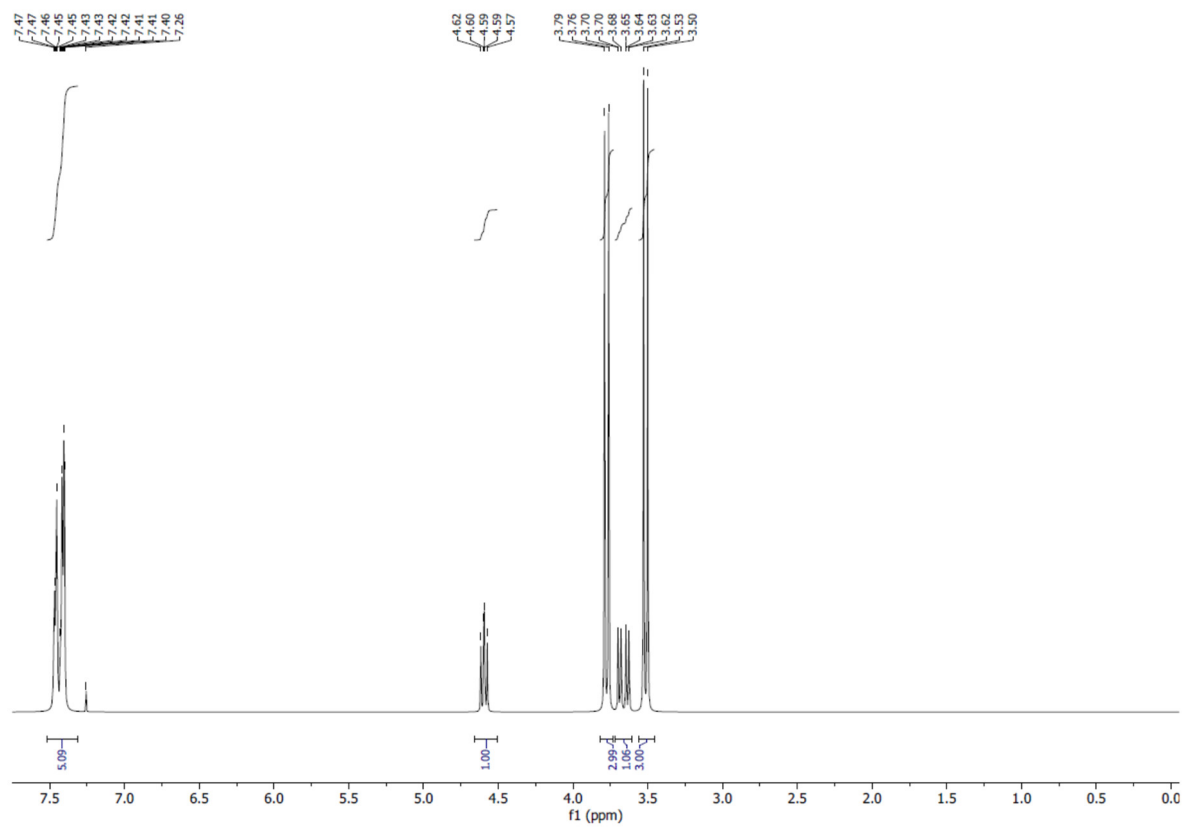

**Figure S1.**  $^1\text{H}$ NMR (400 MHz,  $\text{CDCl}_3$ ) spectra of dimethyl (2,2-dicyano-1-phenylethyl)phosphonate (1).

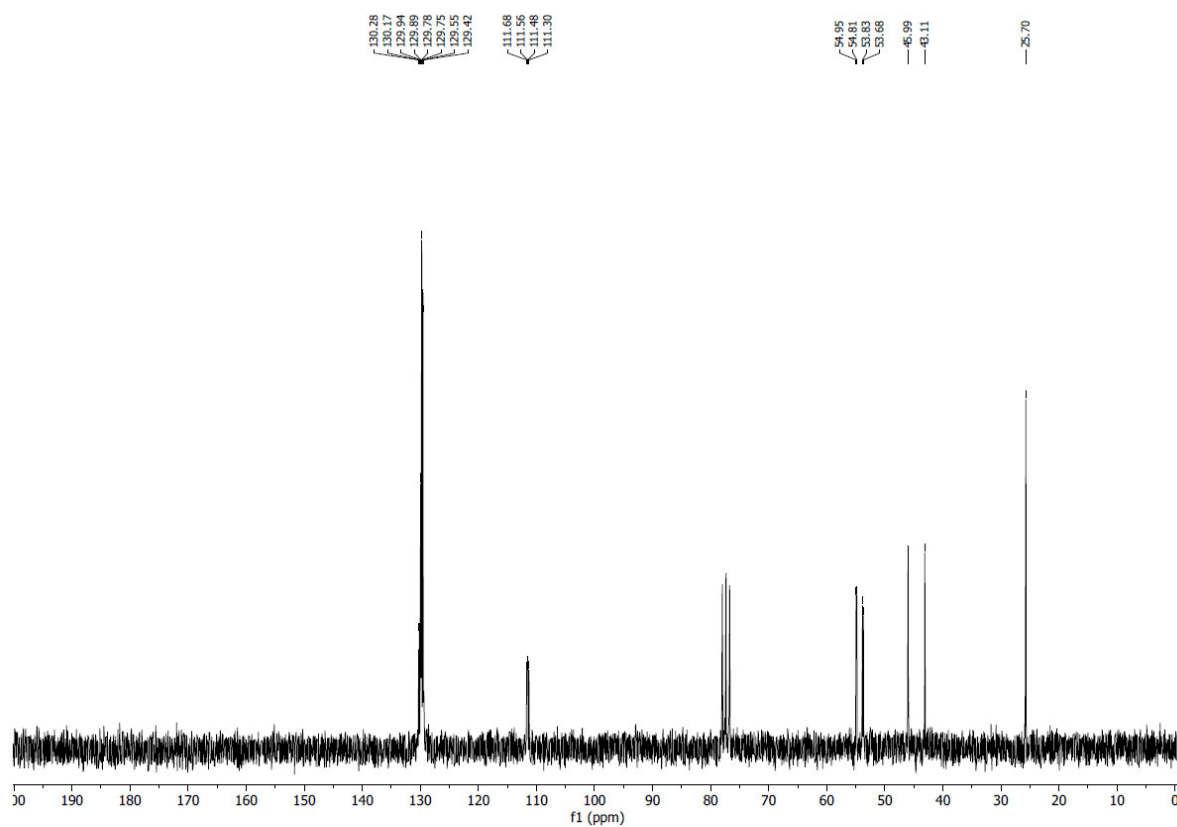

**Figure S2.**  $^{13}\text{C}$ NMR (100 MHz,  $\text{CDCl}_3$ ) spectra of dimethyl (2,2-dicyano-1-phenylethyl)phosphonate (1).

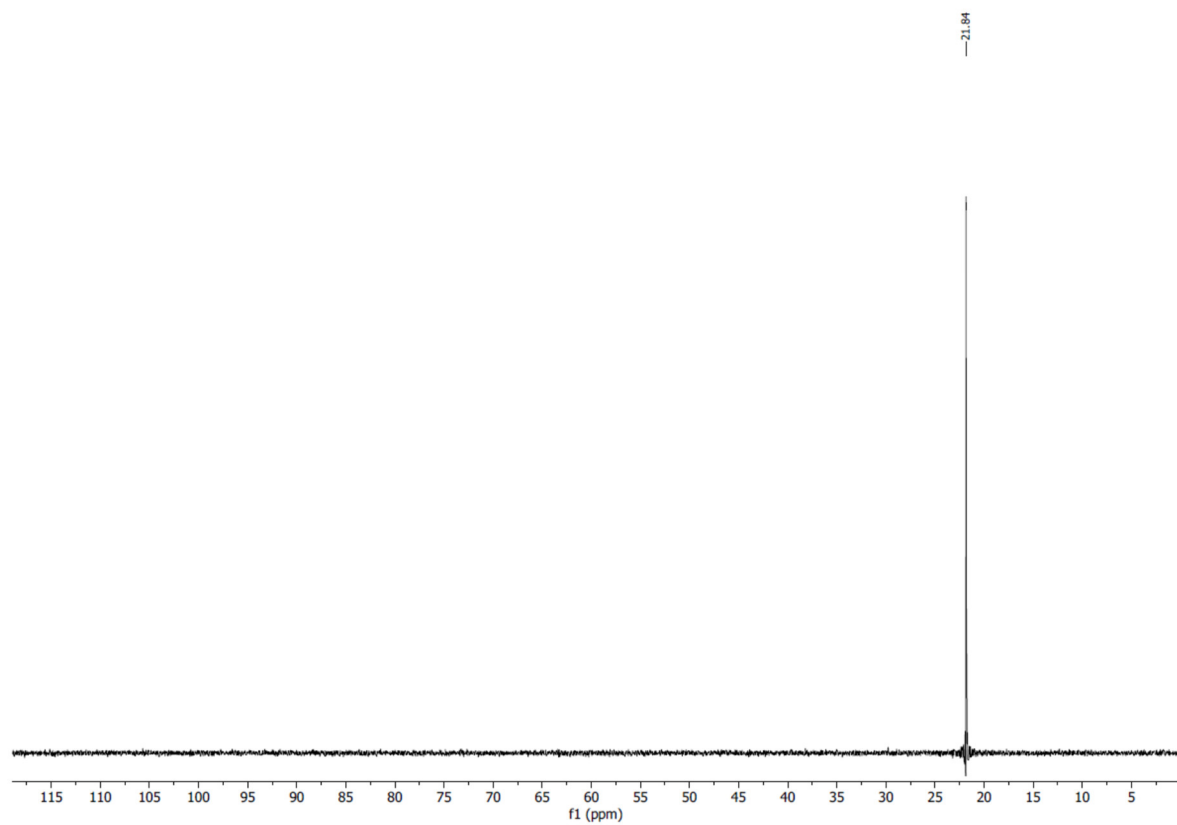

**Figure S3.**  $^{31}\text{P}$ NMR (162 MHz,  $\text{CDCl}_3$ ) spectra of dimethyl (2,2-dicyano-1-phenylethyl)phosphonate (1).

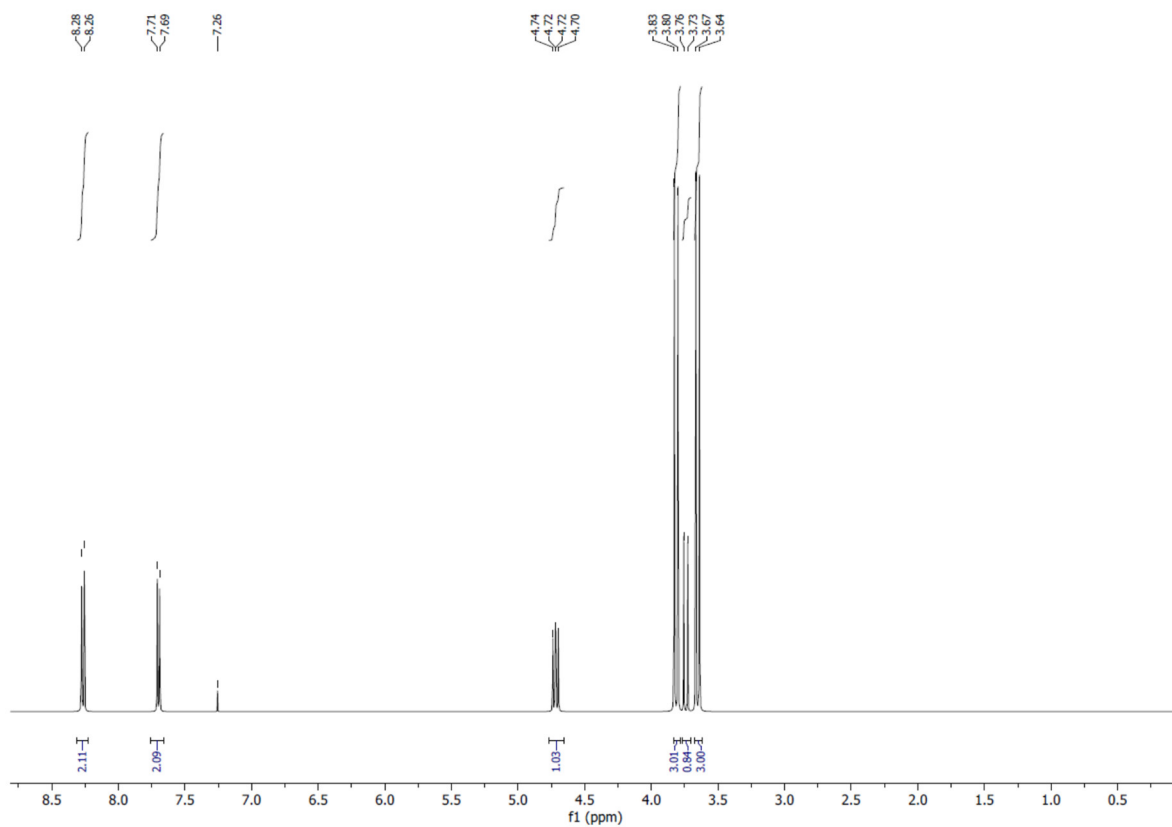

**Figure S4.** <sup>1</sup>H NMR (400 MHz, CDCl<sub>3</sub>) spectra of dimethyl (2,2-dicyano-1-(4-methoxyphenyl)ethyl)phosphonate (2).

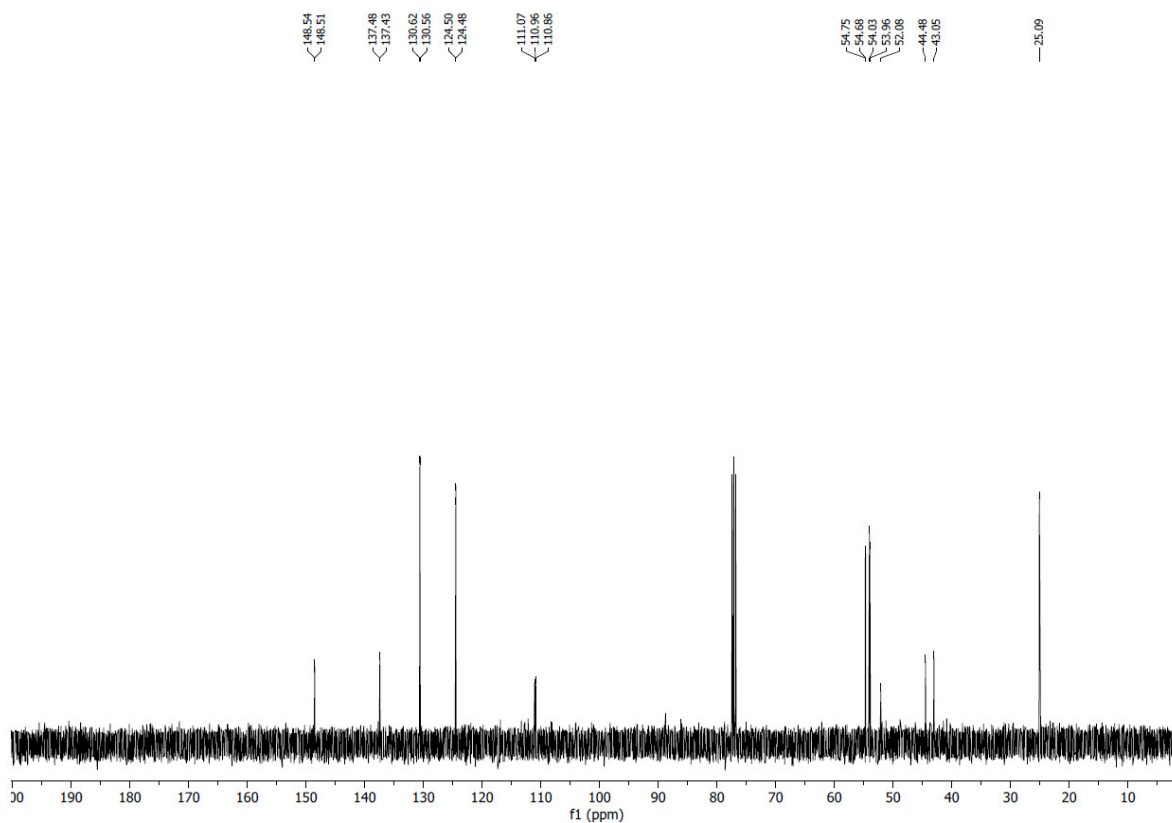

**Figure S5.** <sup>13</sup>C NMR (100 MHz, CDCl<sub>3</sub>) spectra of dimethyl (2,2-dicyano-1-(4-methoxyphenyl)ethyl)phosphonate (2).

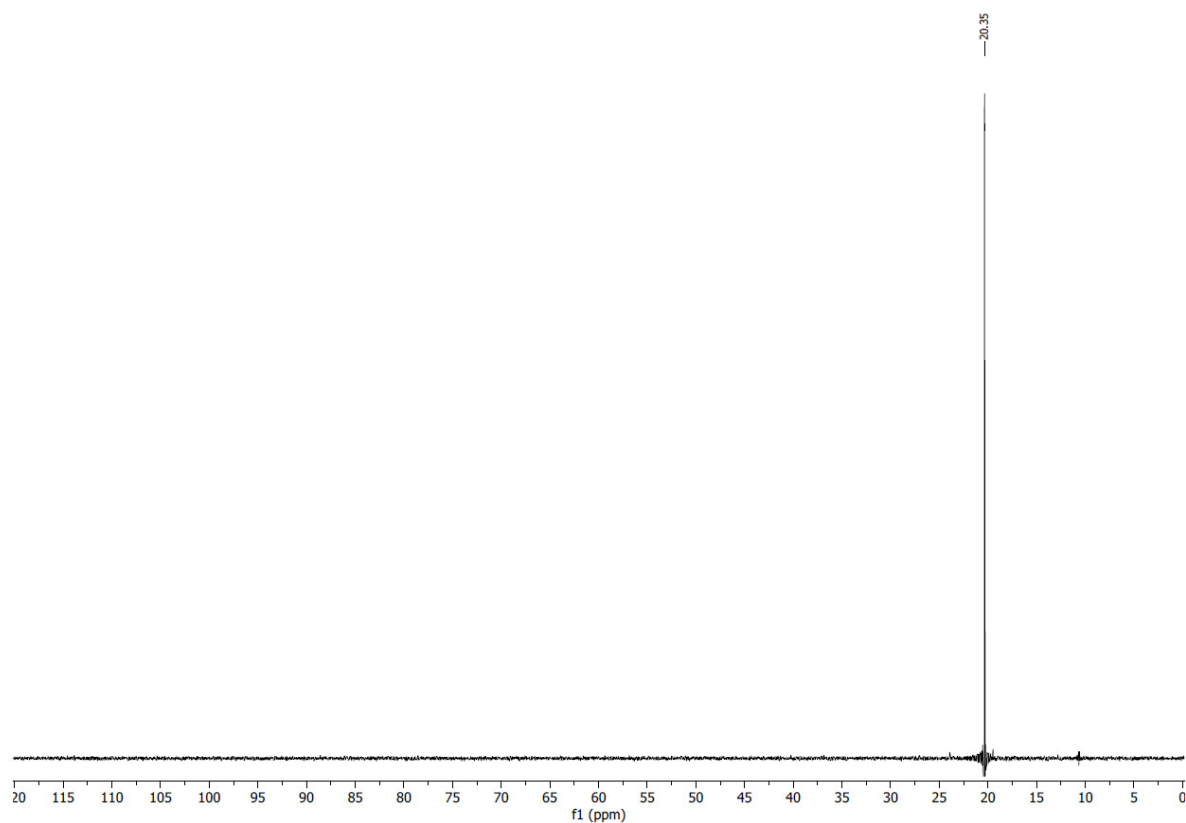

**Figure S6.** <sup>31</sup>P NMR (162 MHz, CDCl<sub>3</sub>) spectra of dimethyl (2,2-dicyano-1-(4-methoxyphenyl)ethyl)phosphonate (2).

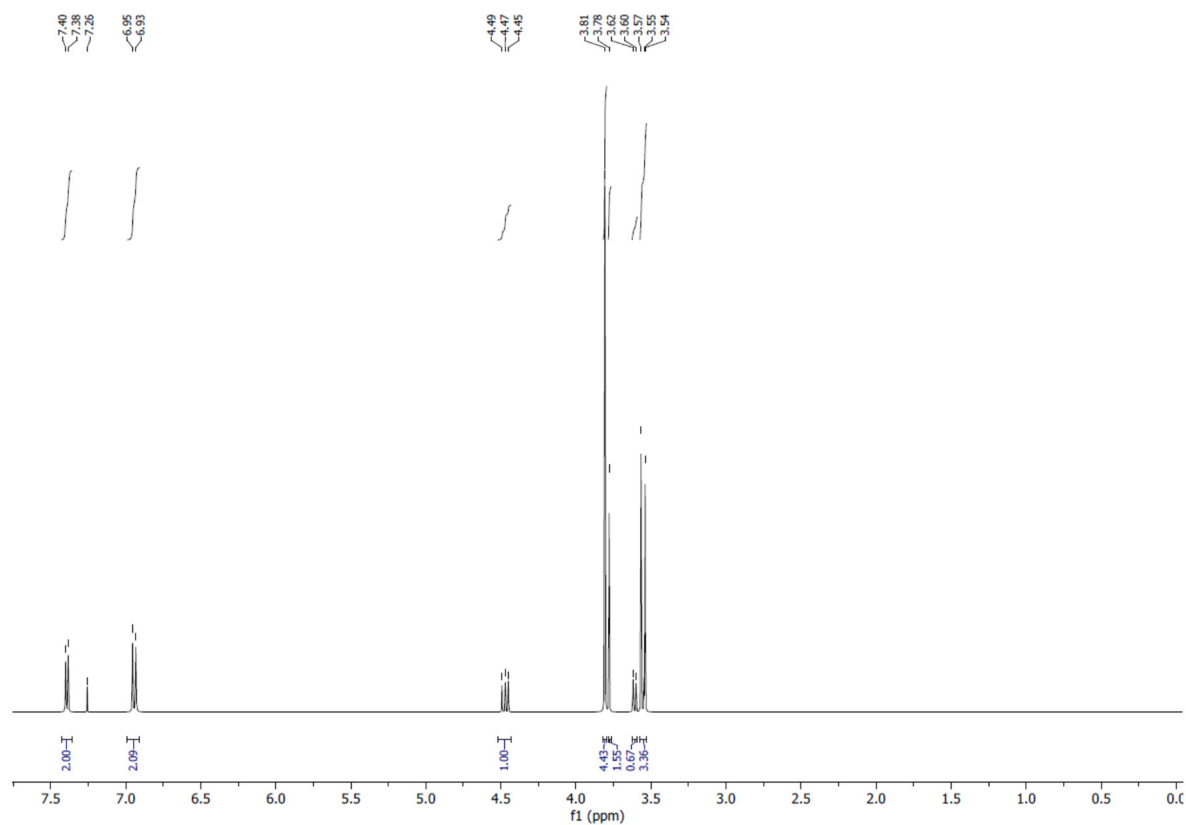

**Figure S7.** <sup>1</sup>H NMR (400 MHz, CDCl<sub>3</sub>) spectra of dimethyl (2,2-dicyano-1-(4-methoxyphenyl)ethyl)phosphonate (3)

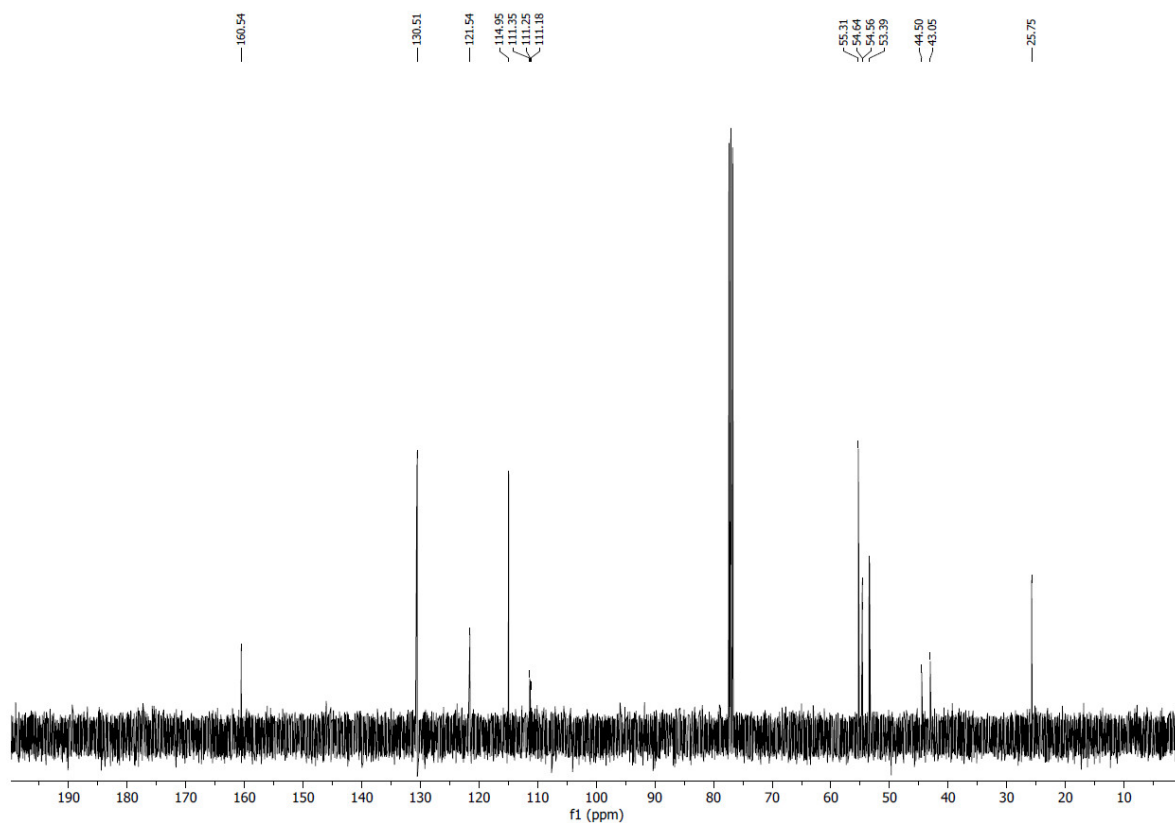

**Figure S8.**  $^{13}\text{C}$ NMR (100 MHz,  $\text{CDCl}_3$ ) spectra of dimethyl (2,2-dicyano-1-(4-methoxyphenyl)ethyl)phosphonate (3)

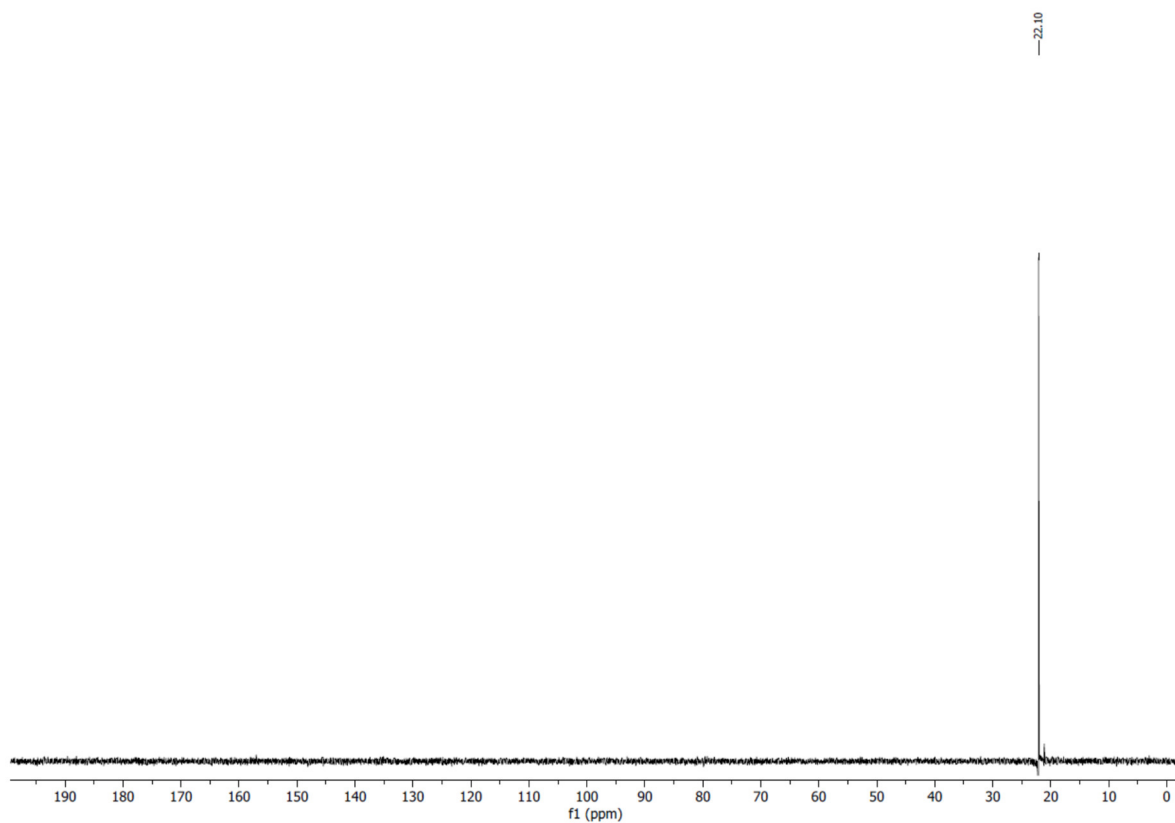

**Figure S9.**  $^{31}\text{P}$ NMR (162 MHz,  $\text{CDCl}_3$ ) spectra of dimethyl (2,2-dicyano-1-(4-methoxyphenyl)ethyl)phosphonate (3)

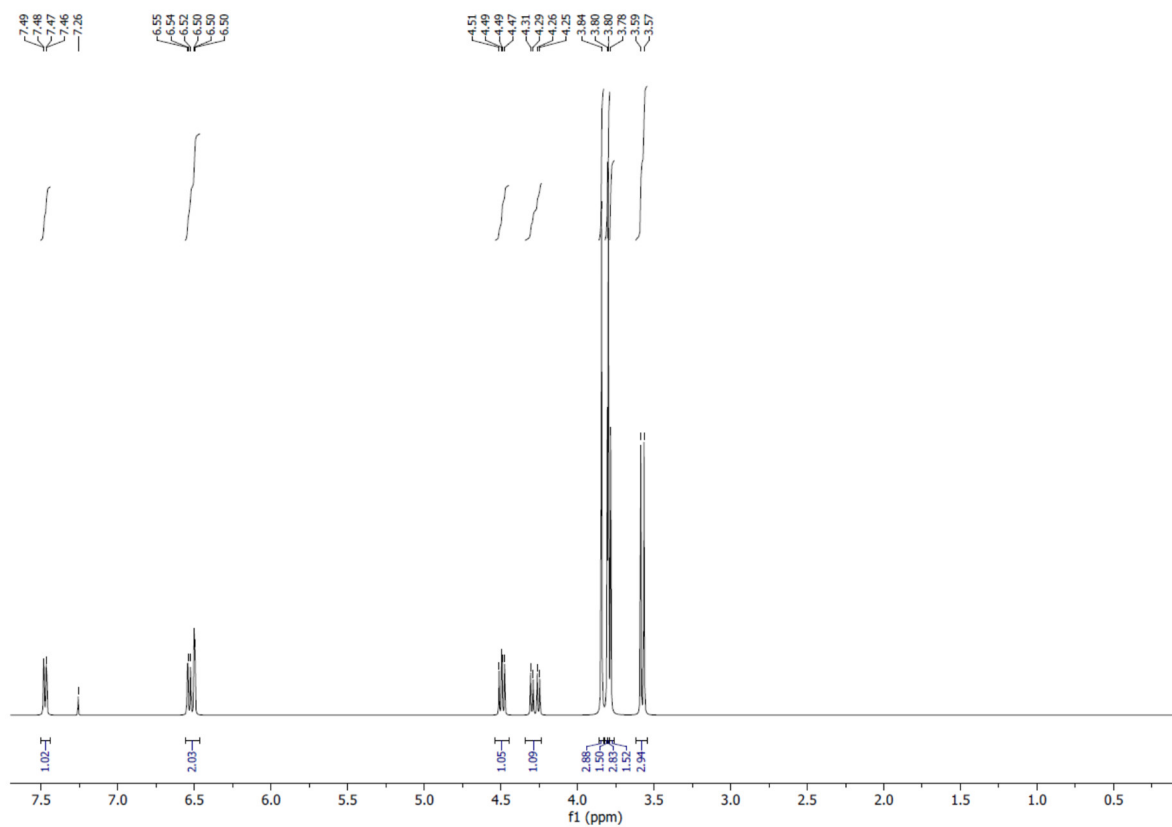

**Figure S10.** <sup>1</sup>H NMR (500 MHz, CDCl<sub>3</sub>) spectra of dimethyl (2,2-dicyano-1-(2,4-dimethoxyphenyl)ethyl)phosphonate (4)

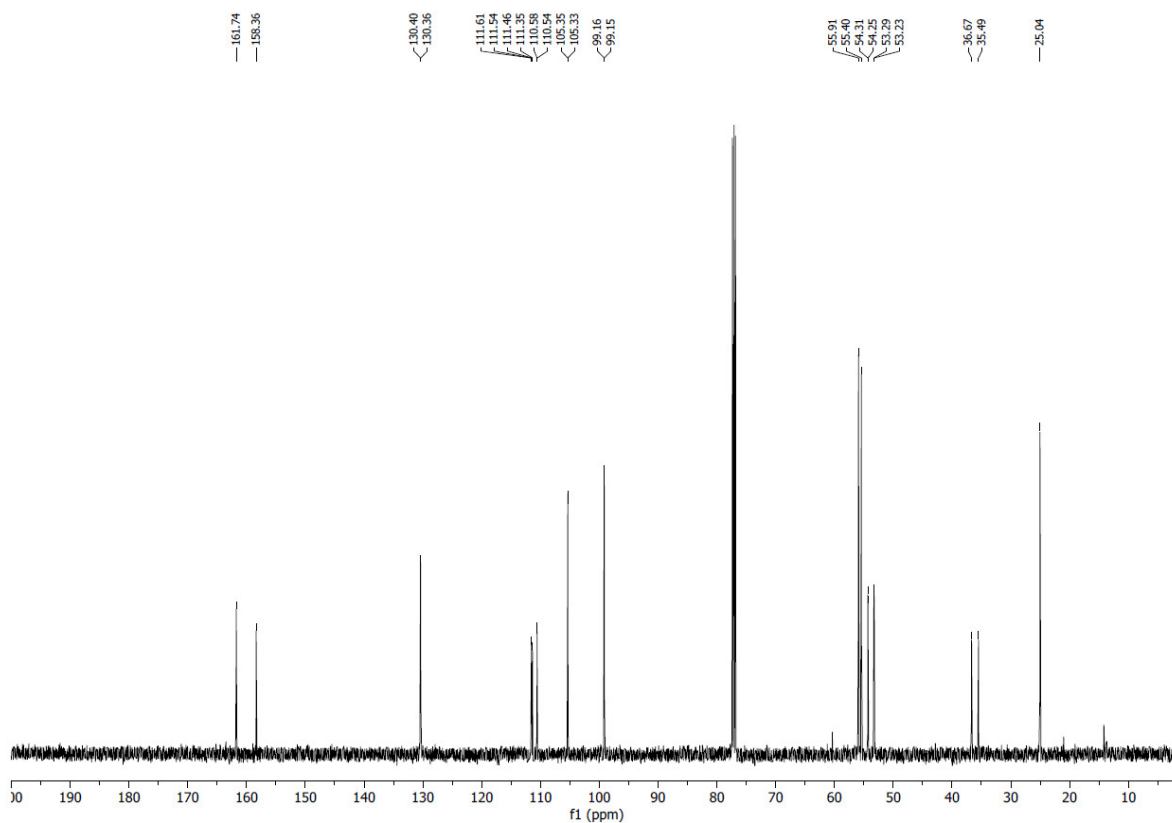

**Figure S11.** <sup>13</sup>C NMR (125 MHz, CDCl<sub>3</sub>) spectra of dimethyl (2,2-dicyano-1-(2,4-dimethoxyphenyl)ethyl)phosphonate (4)

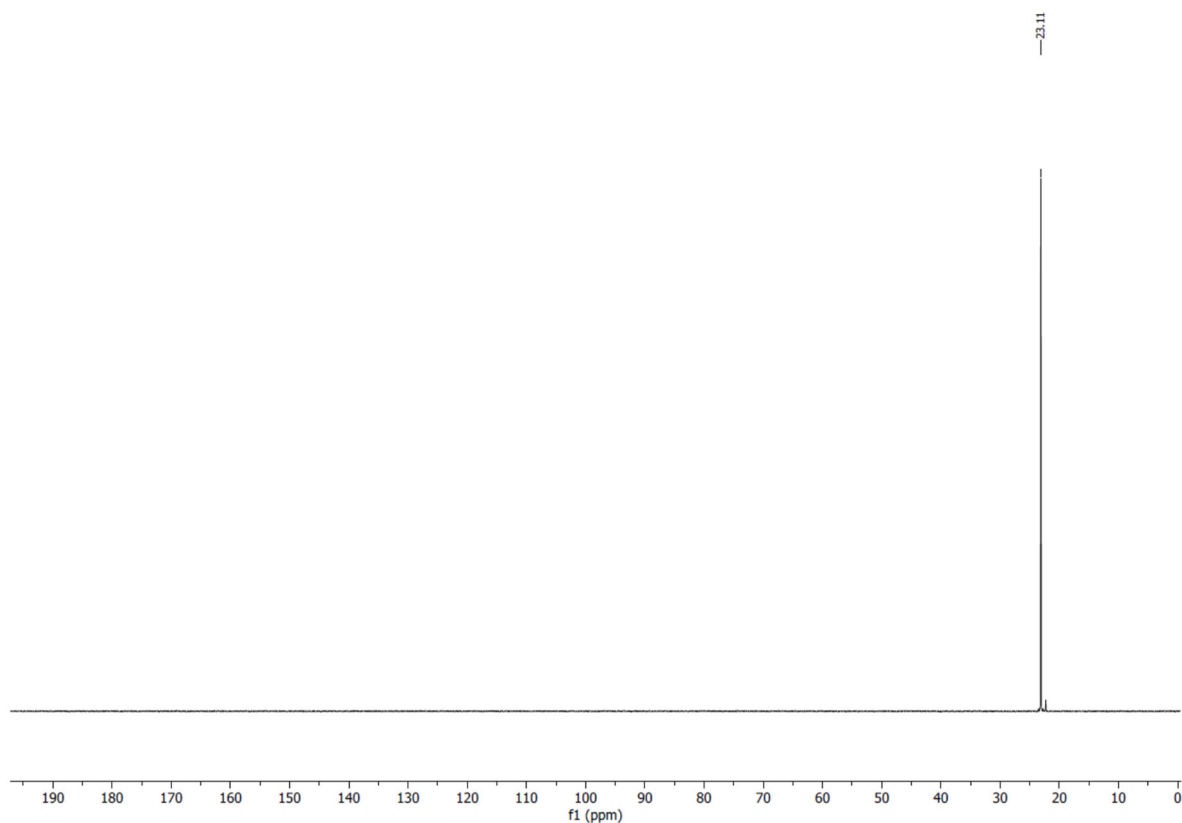

**Figure S12.**  $^{31}\text{P}$  NMR (203 MHz,  $\text{CDCl}_3$ ) spectra of dimethyl (2,2-dicyano-1-(2,4-dimethoxyphenyl)ethyl)phosphonate (4)

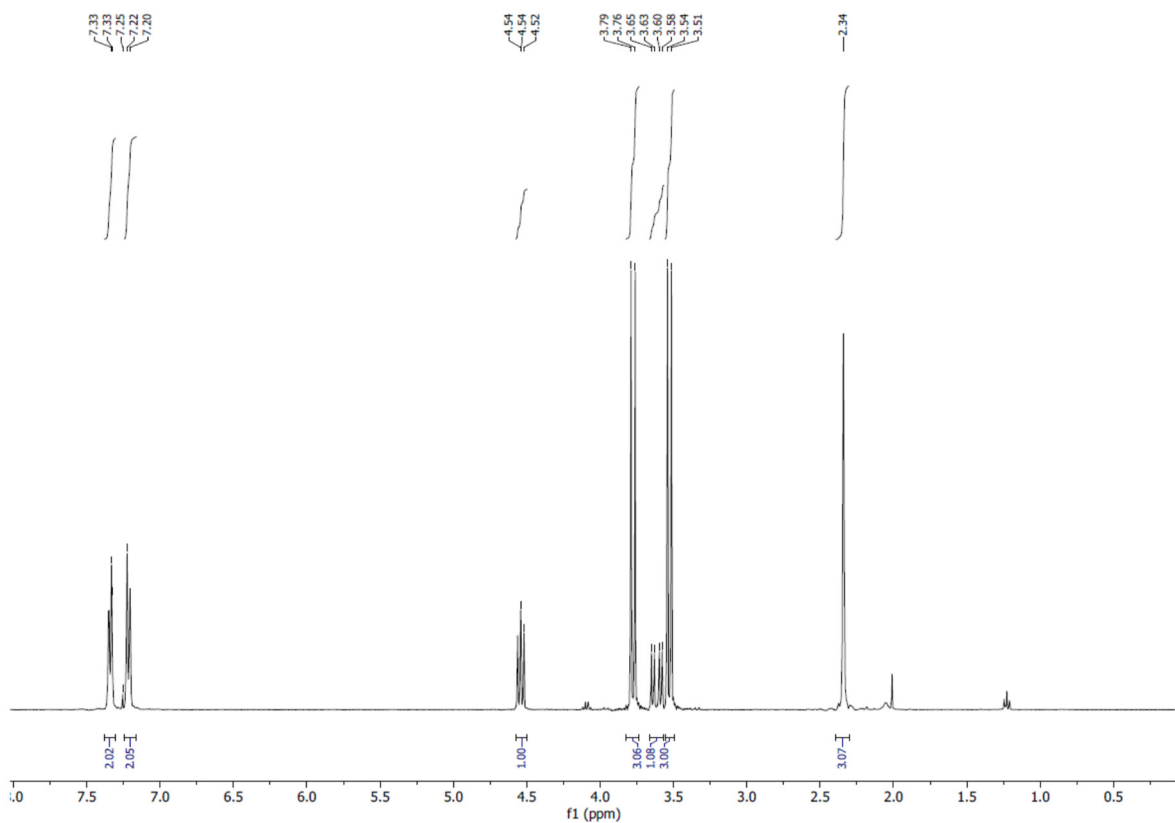

**Figure S13.**  $^1\text{H}$  NMR (400 MHz,  $\text{CDCl}_3$ ) spectra of dimethyl (2,2-dicyano-1-(4-methylphenyl)ethyl)phosphonate (5).

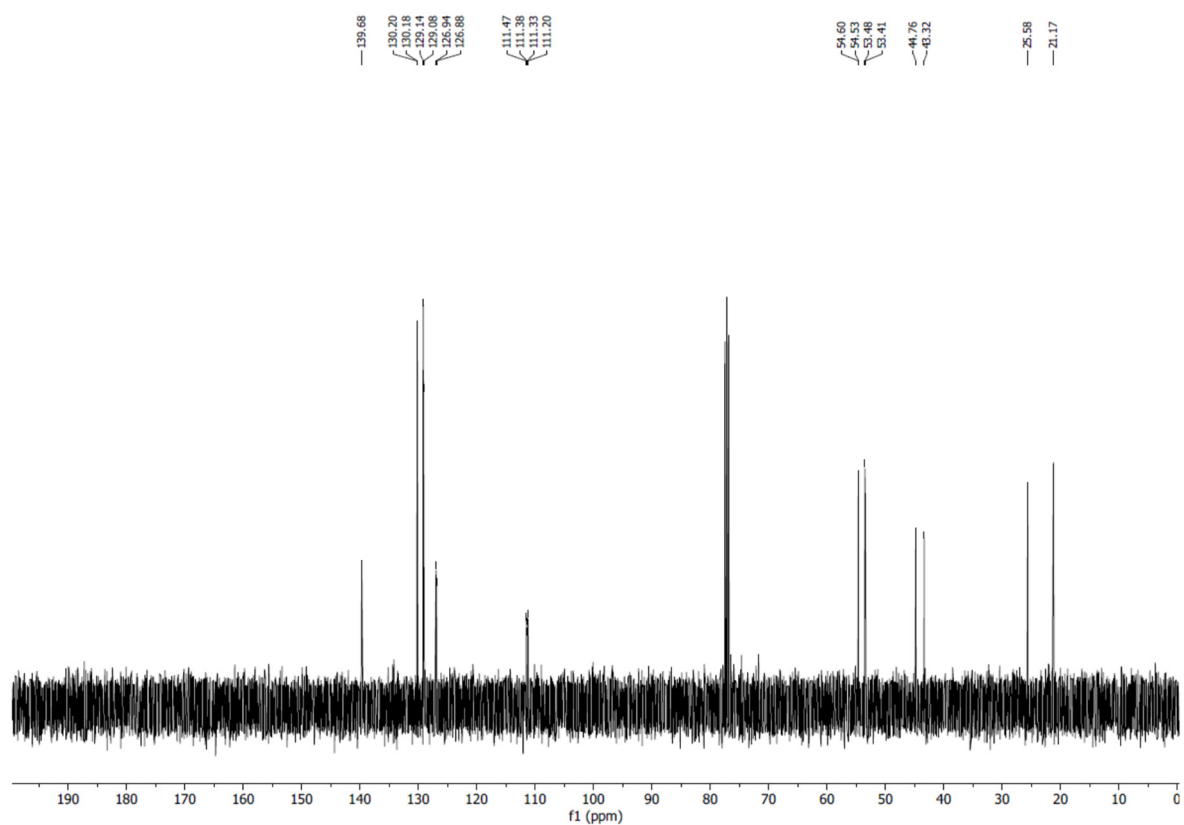

**Figure S14.**  $^{13}\text{C}$  NMR (100 MHz,  $\text{CDCl}_3$ ) spectra of dimethyl (2,2-dicyano-1-(4-methylphenyl)ethyl)phosphonate (**5**).

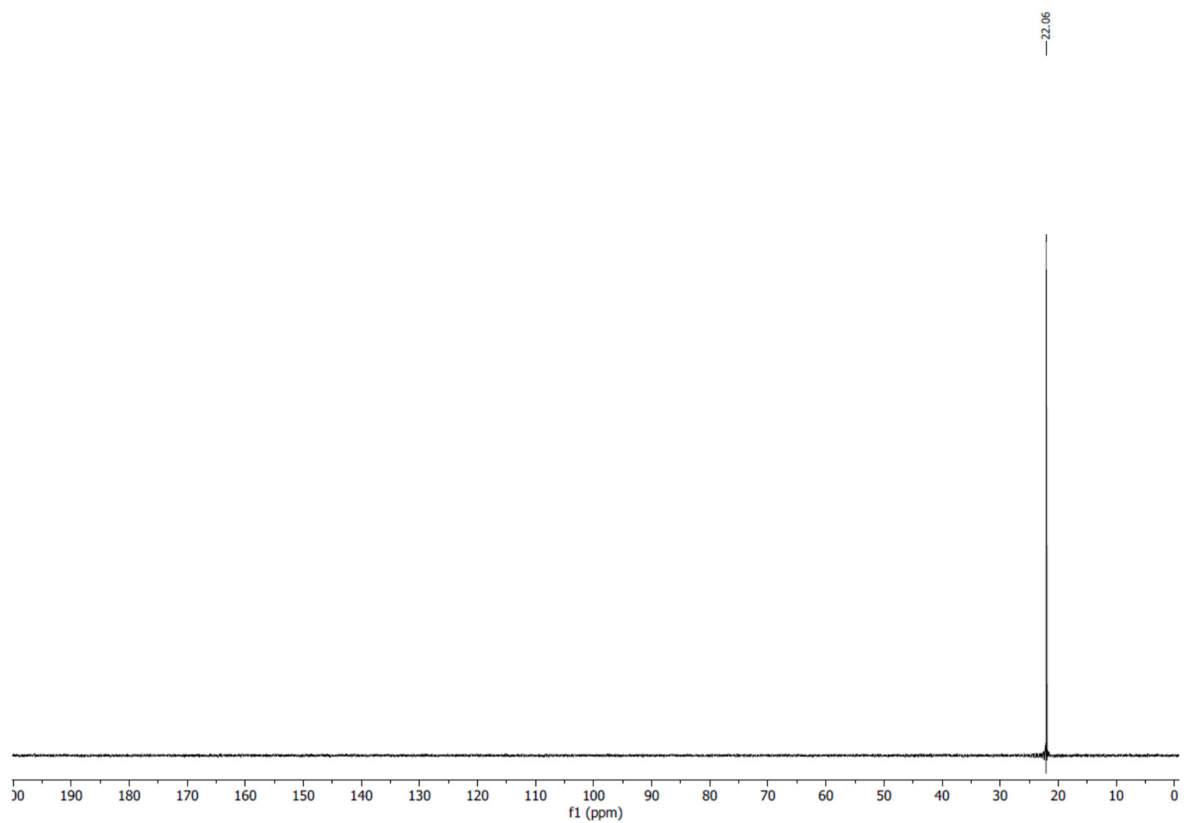

**Figure S15.**  $^{31}\text{P}$  NMR (162 MHz,  $\text{CDCl}_3$ ) spectra of dimethyl (2,2-dicyano-1-(4-methylphenyl)ethyl)phosphonate (**5**).



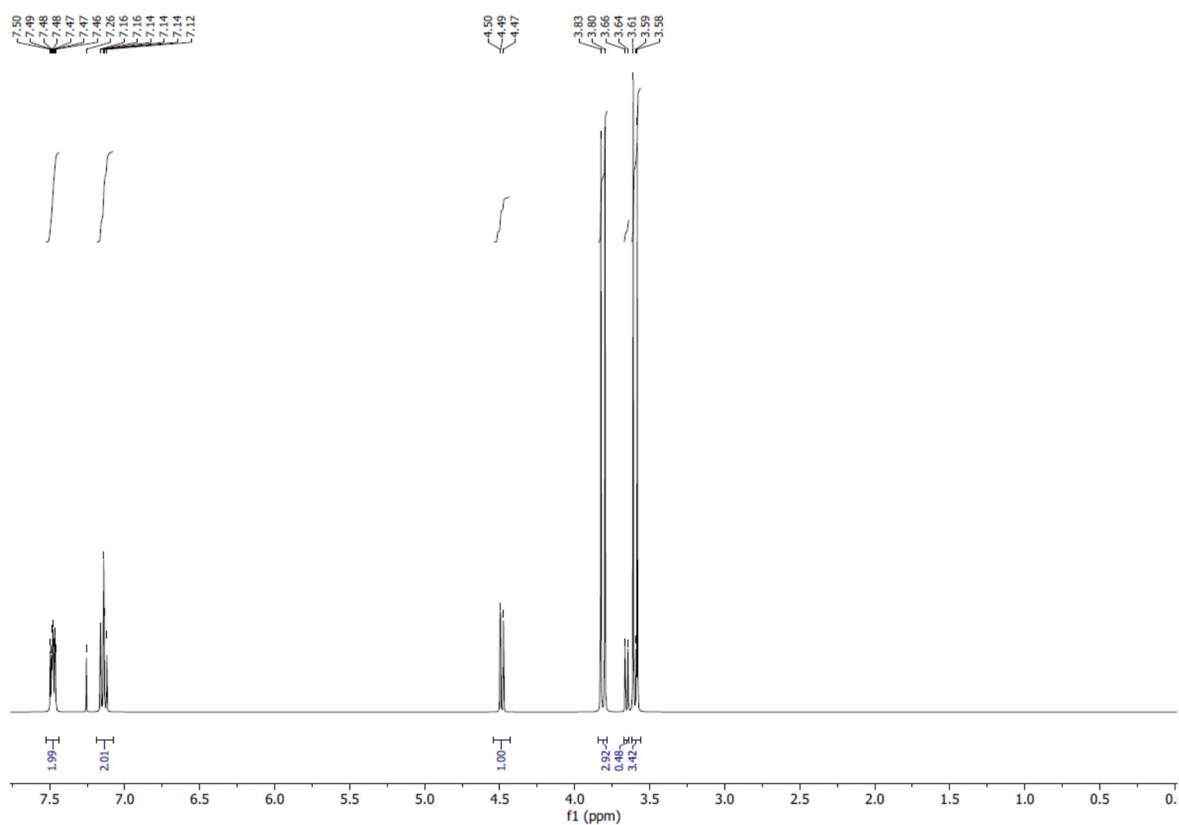

**Figure S16.** <sup>1</sup>H NMR (400 MHz, CDCl<sub>3</sub>) spectra of dimethyl (2,2-dicyano-1-(4-fluorophenyl)ethyl)phosphonate (6).

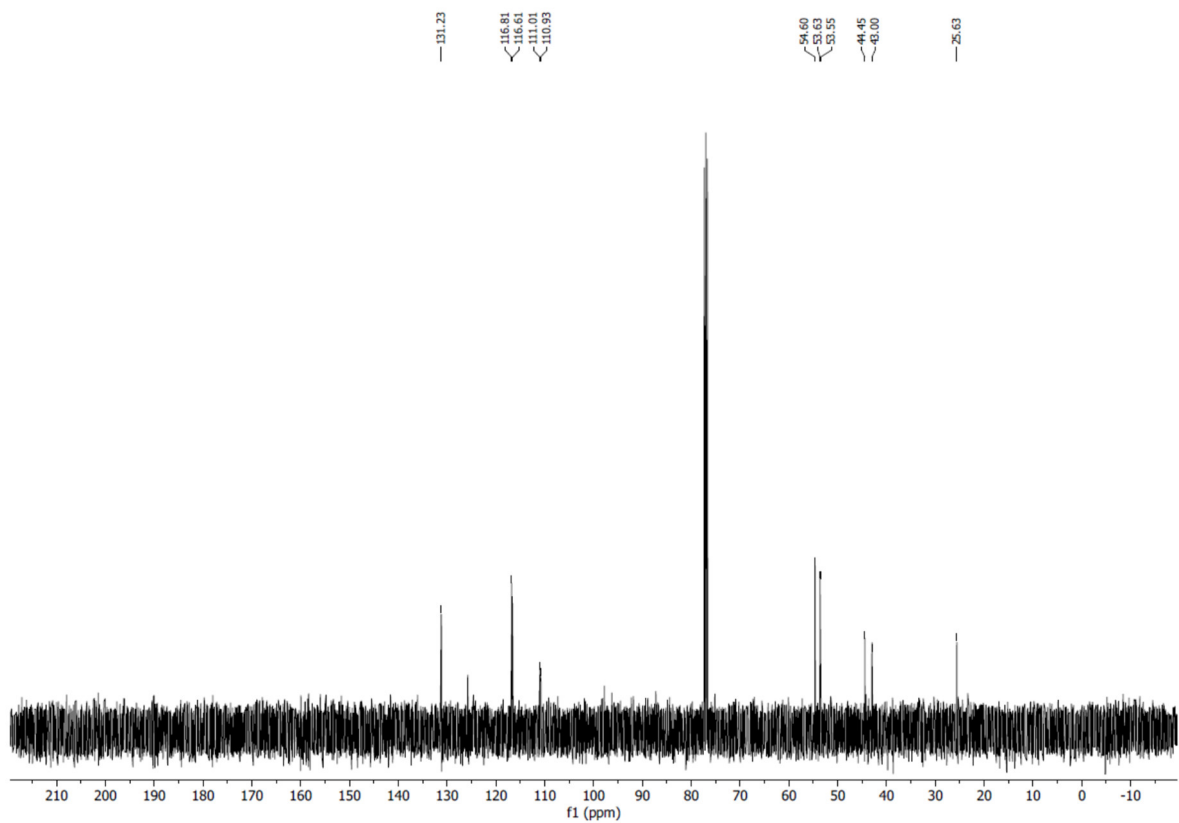

**Figure S17.** <sup>13</sup>C NMR (100 MHz, CDCl<sub>3</sub>) spectra of dimethyl (2,2-dicyano-1-(4-fluorophenyl)ethyl)phosphonate (6).

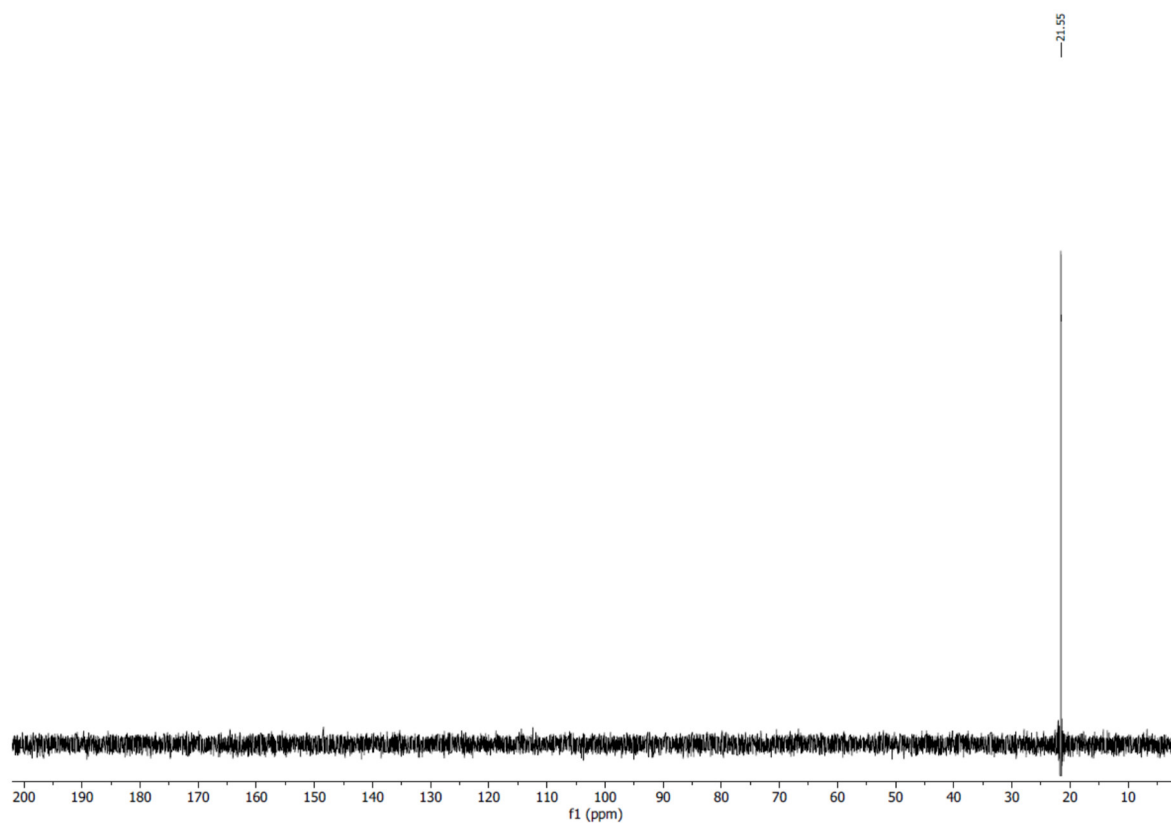

**Figure S18.**  $^{31}\text{P}$  NMR (162 MHz,  $\text{CDCl}_3$ ) spectra of dimethyl (2,2-dicyano-1-(4-fluorophenyl)ethyl)phosphonate (**6**).

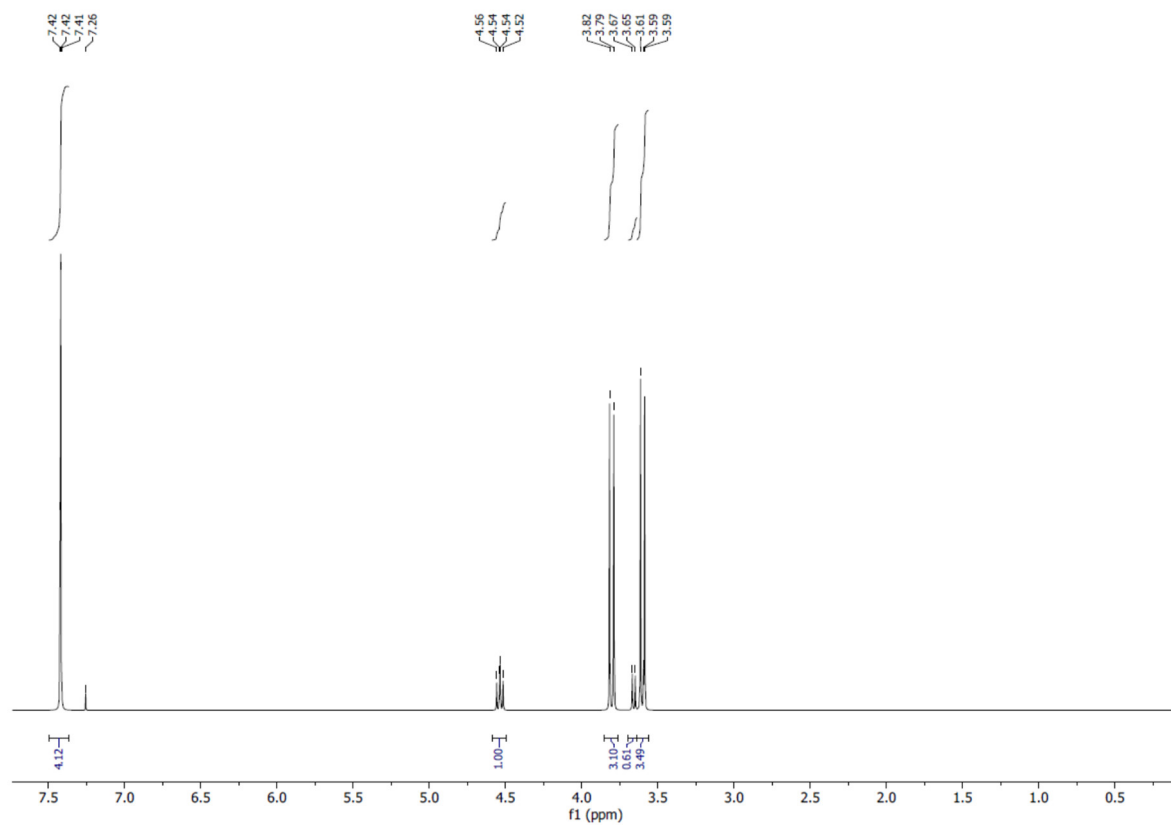

**Figure S19.**  $^1\text{H}$  NMR (400 MHz,  $\text{CDCl}_3$ ) spectra of dimethyl (2,2-dicyano-1-(4-chlorophenyl)ethyl)phosphonate (**7**).

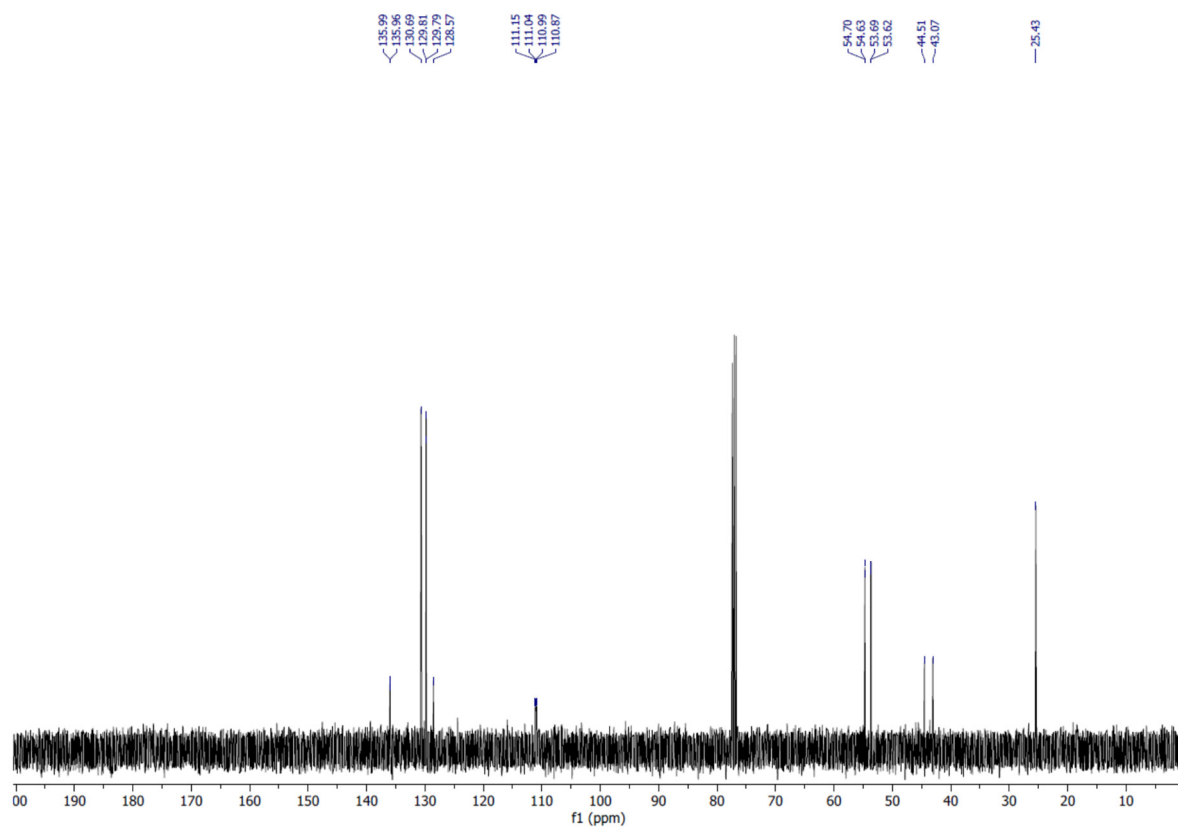

**Figure S20.** <sup>13</sup>C NMR (100 MHz, CDCl<sub>3</sub>) spectra of dimethyl (2,2-dicyano-1-(4-chlorophenyl)ethyl)phosphonate (7).

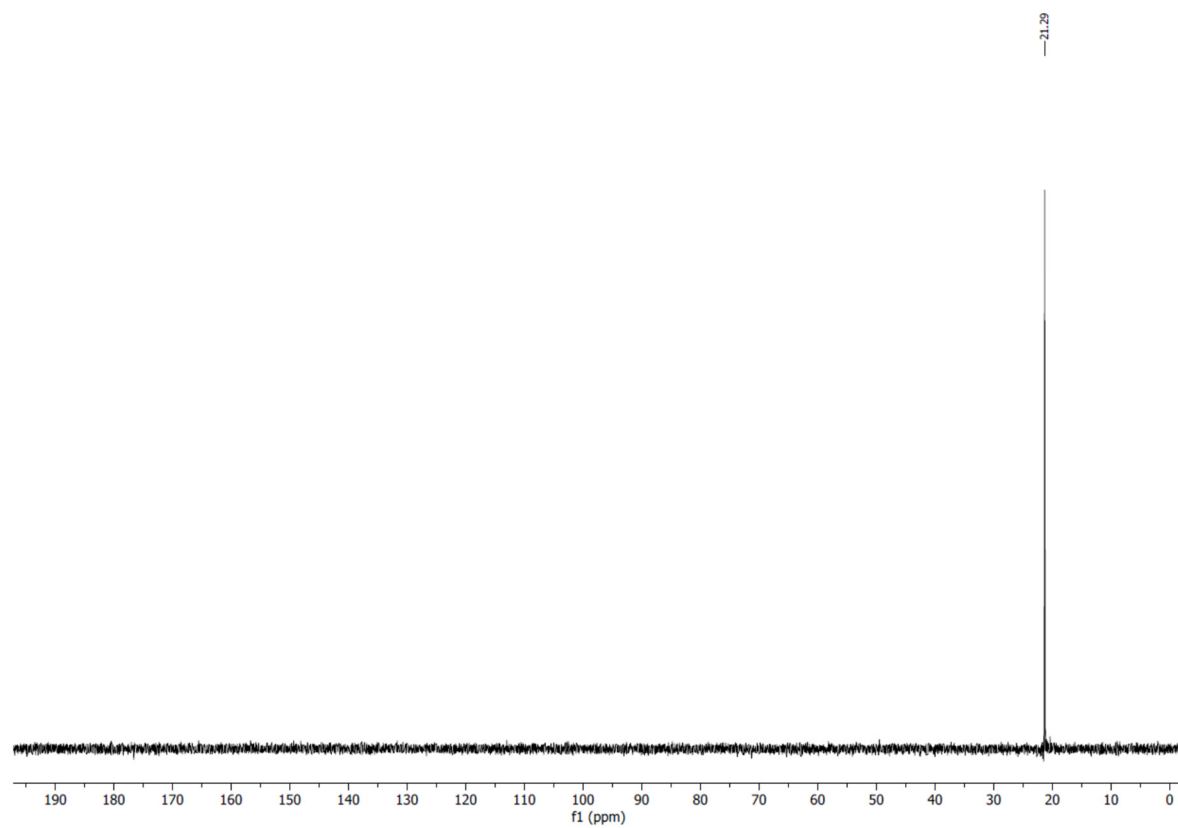

**Figure S21.** <sup>31</sup>P NMR (162 MHz, CDCl<sub>3</sub>) spectra of dimethyl (2,2-dicyano-1-(4-chlorophenyl)ethyl)phosphonate (7).

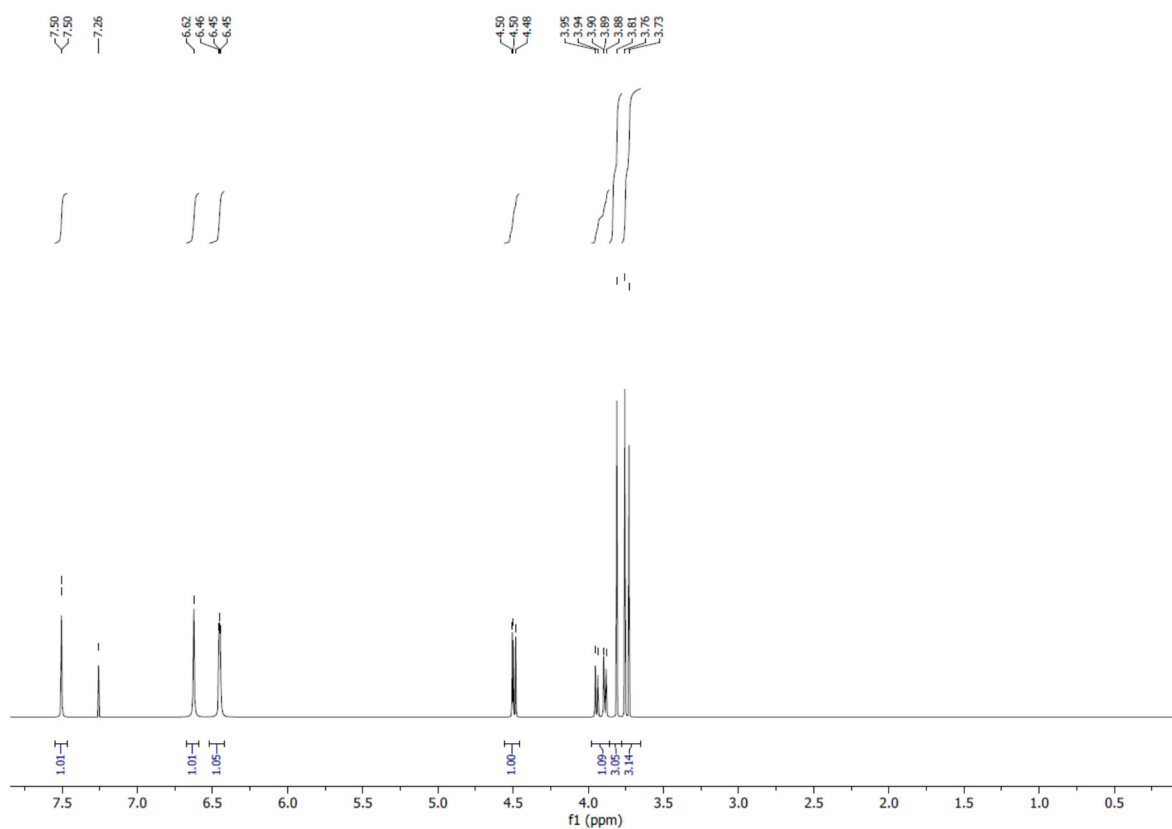

**Figure S22.** <sup>1</sup>H NMR (400 MHz, CDCl<sub>3</sub>) spectra of dimethyl (2,2-dicyano-1-(furan-2-yl)ethyl)phosphonate (8).

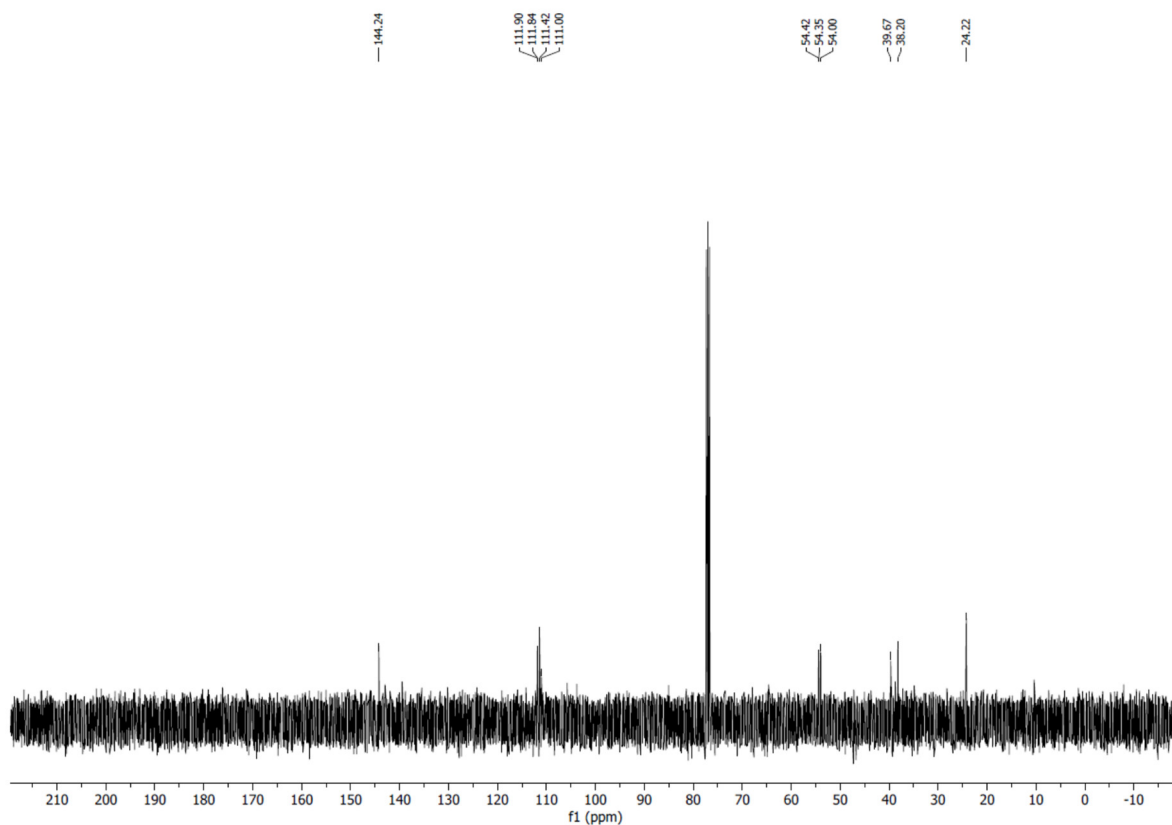

**Figure S23.** <sup>13</sup>C NMR (100 MHz, CDCl<sub>3</sub>) spectra of dimethyl (2,2-dicyano-1-(furan-2-yl)ethyl)phosphonate (8).

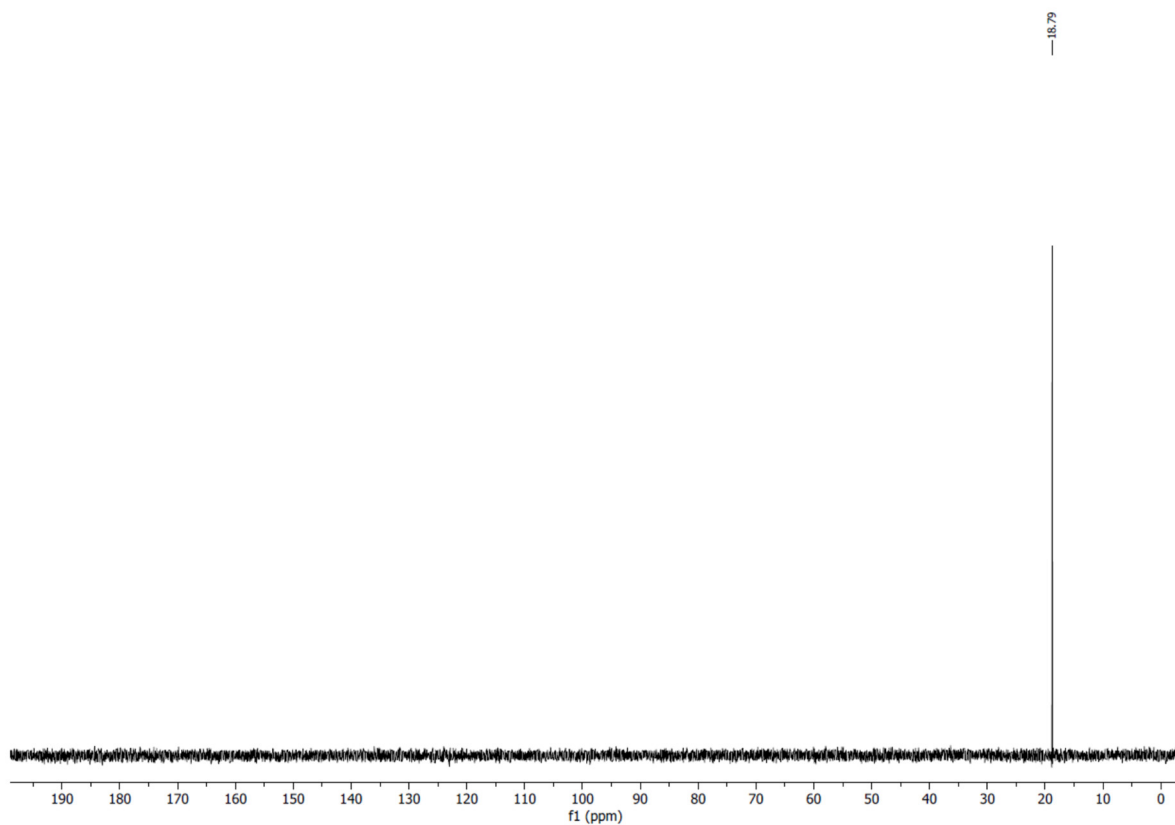

**Figure S24.**  $^{31}\text{P}$  NMR (162 MHz,  $\text{CDCl}_3$ ) spectra of dimethyl (2,2-dicyano-1-(furan-2-yl)ethyl)phosphonate (8).

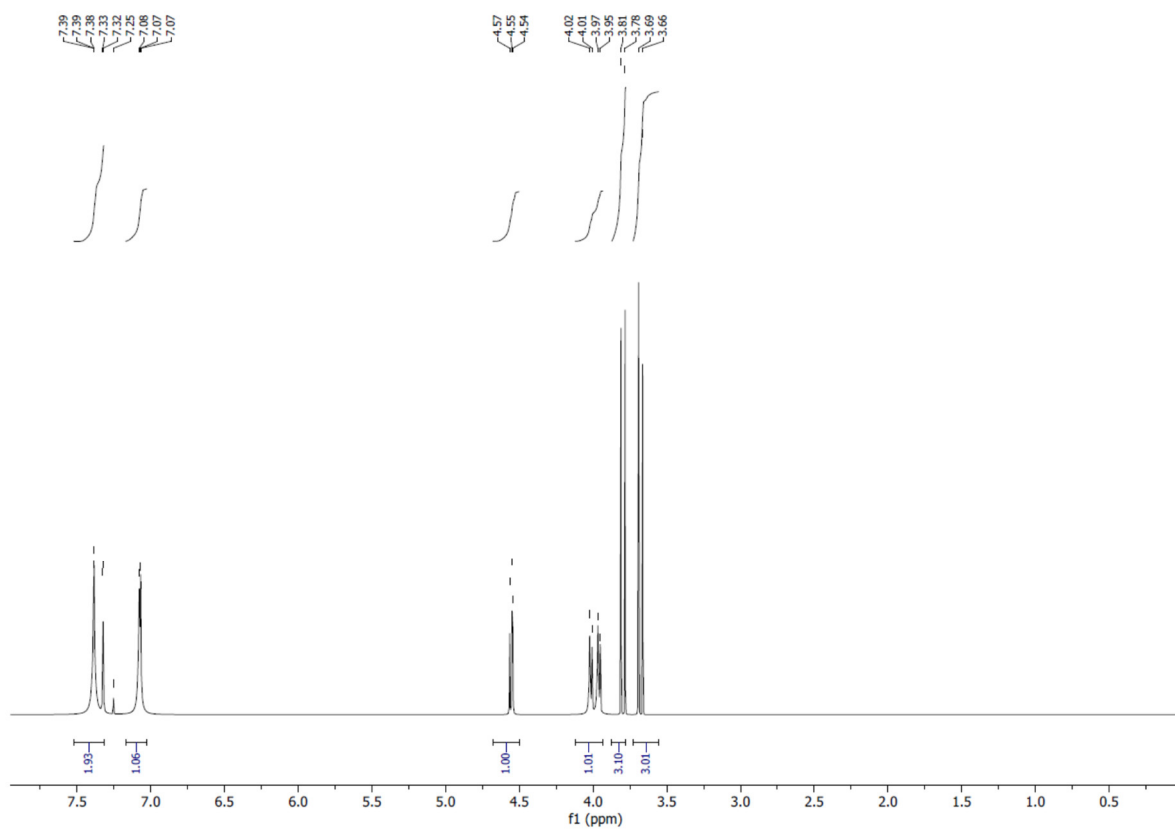

**Figure S25.**  $^1\text{H}$  NMR (400 MHz,  $\text{CDCl}_3$ ) spectra of dimethyl (2,2-dicyano-1-(thiophen-2-yl)ethyl)phosphonate (9).

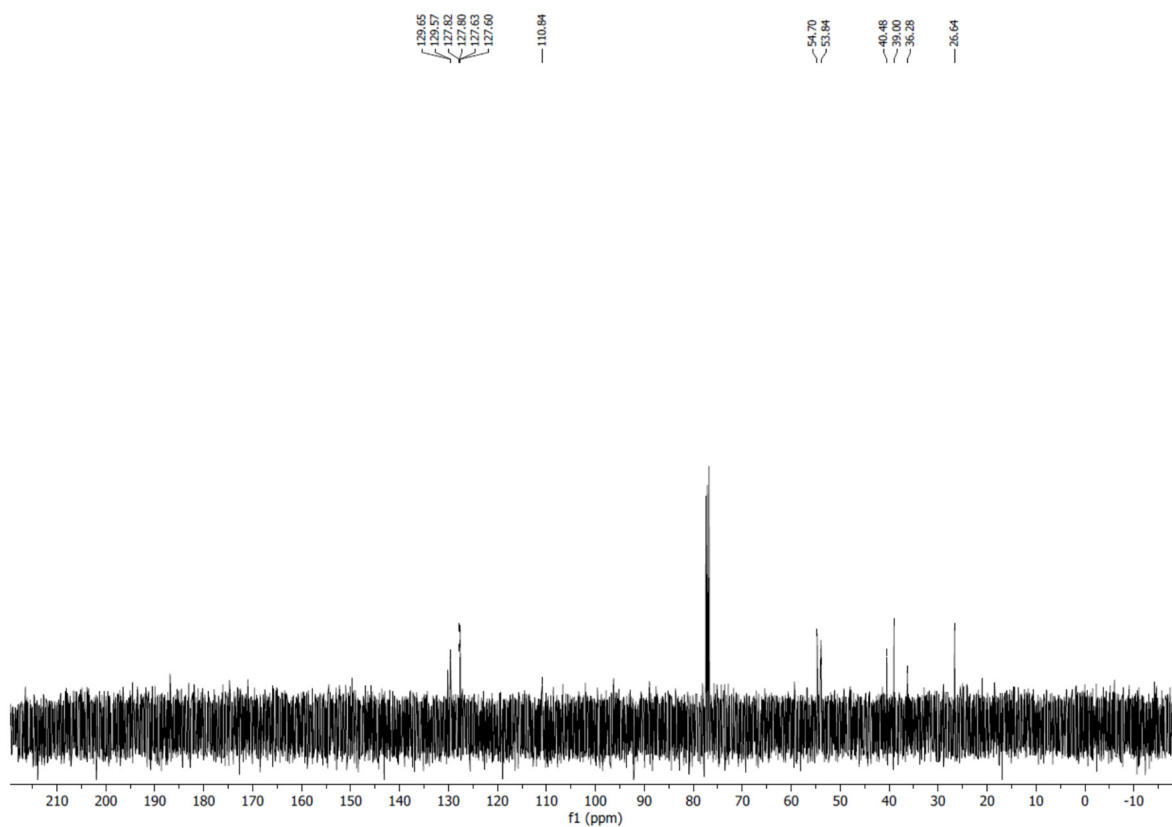

**Figure S26.**  $^{13}\text{C}$  NMR (100 MHz,  $\text{CDCl}_3$ ) spectra of dimethyl (2,2-dicyano-1-(thiophen-2-yl)ethyl)phosphonate (**9**).

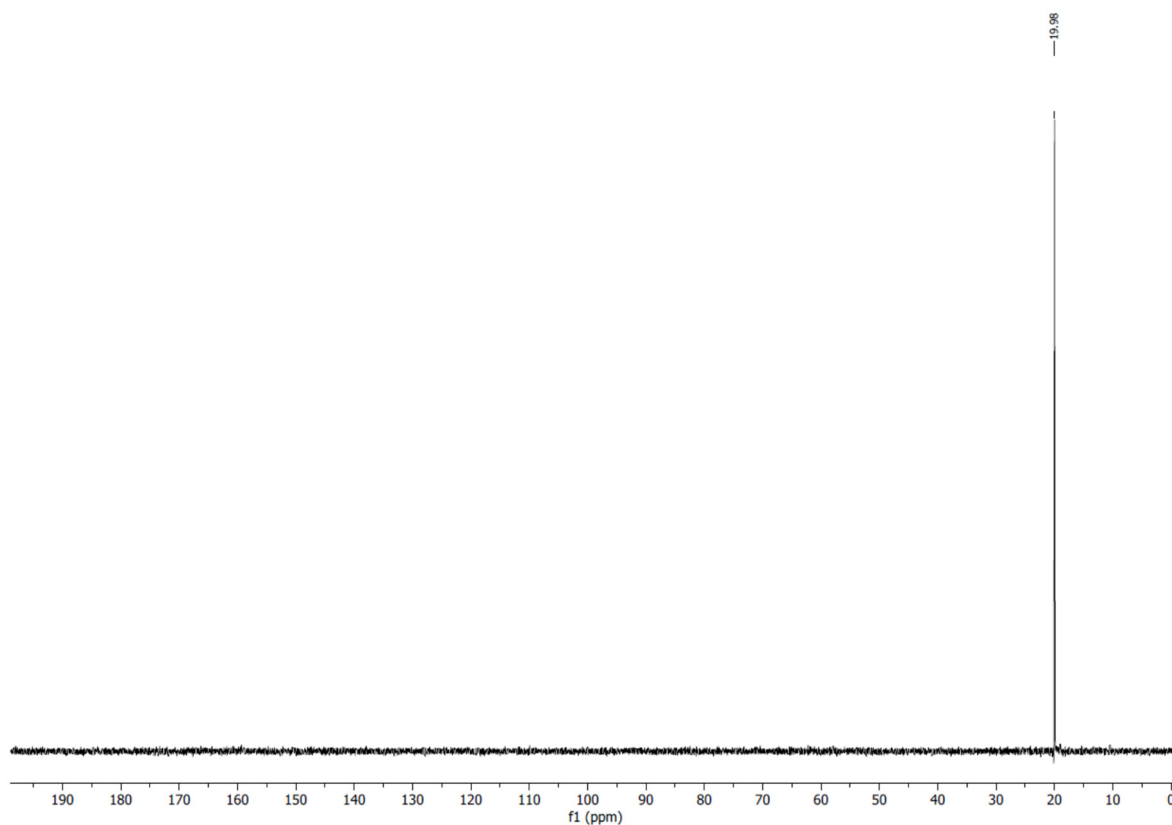

**Figure S27.**  $^{31}\text{P}$  NMR (162 MHz,  $\text{CDCl}_3$ ) spectra of dimethyl (2,2-dicyano-1-(thiophen-2-yl)ethyl)phosphonate (**9**).

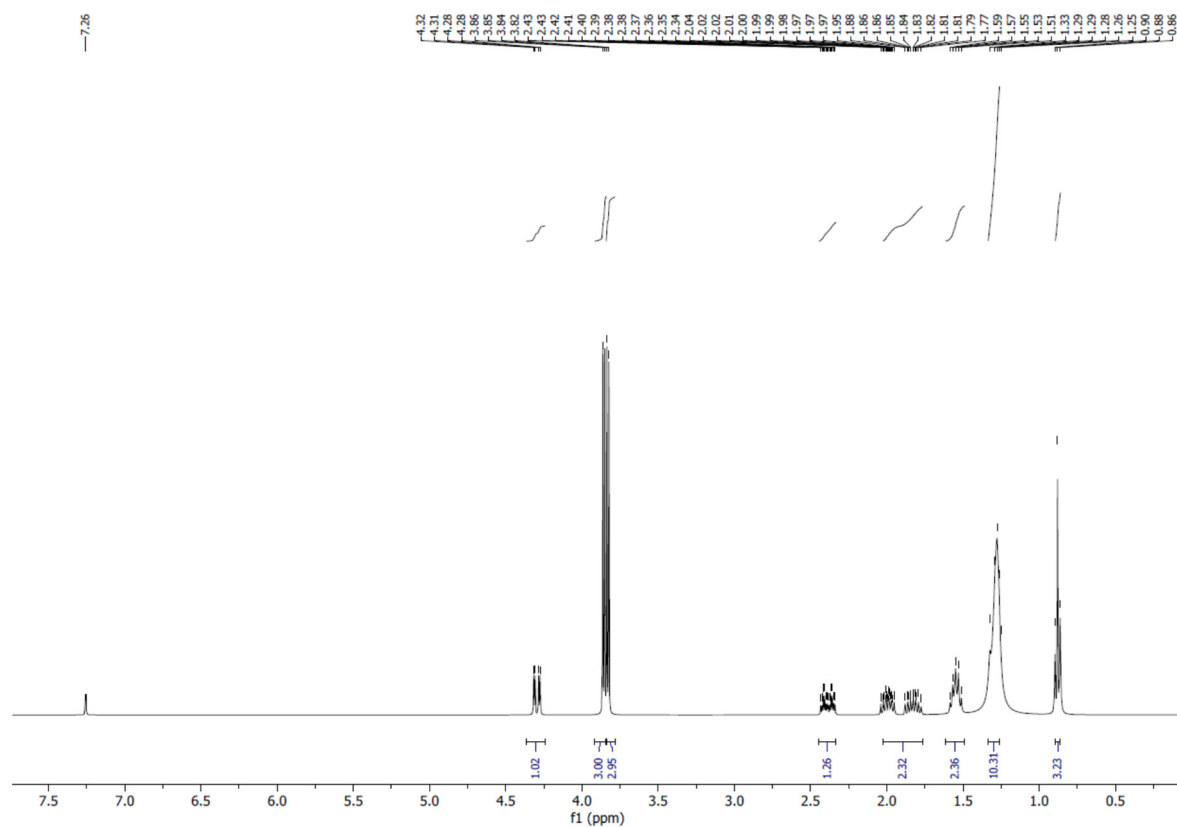

**Figure S28.** <sup>1</sup>H NMR (400 MHz, CDCl<sub>3</sub>) spectra of dimethyl (2,2-dicyano-1-monooctyl)phosphonate (10).

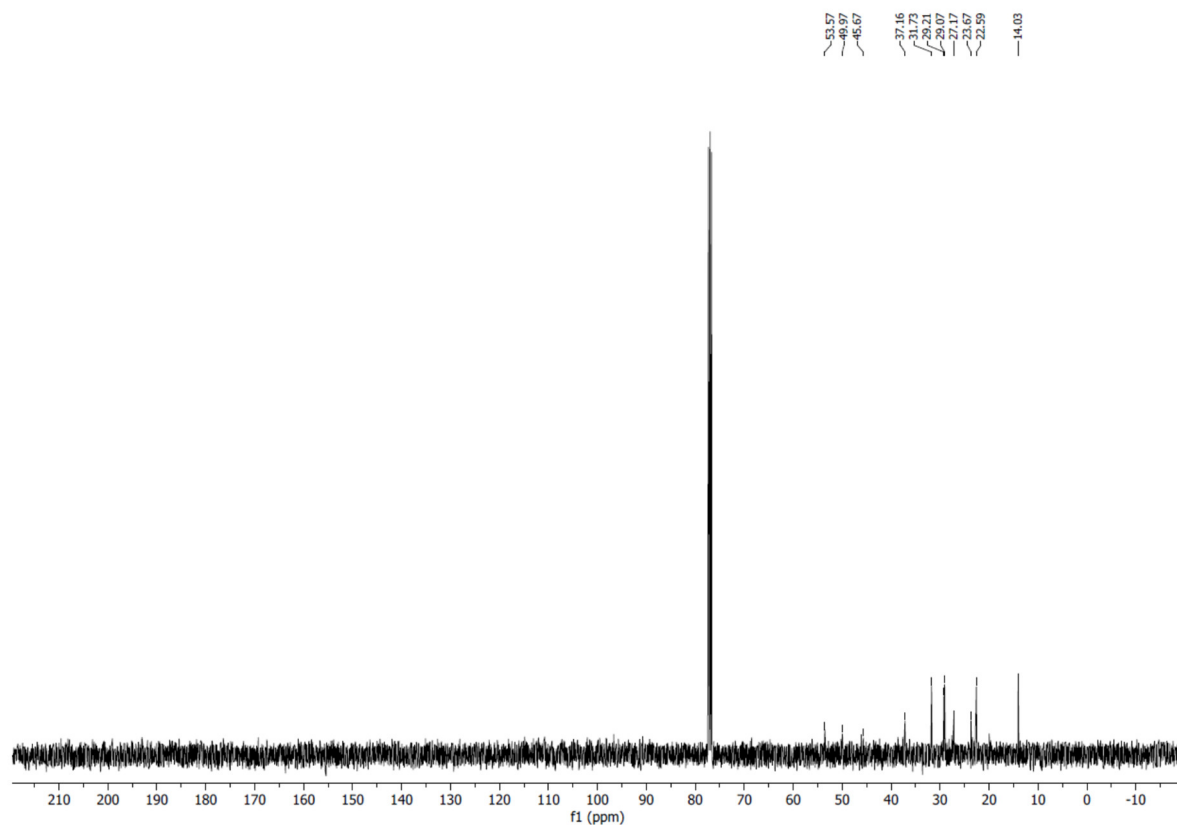

**Figure S29.** <sup>13</sup>C NMR (100 MHz, CDCl<sub>3</sub>) spectra of dimethyl (2,2-dicyano-1-monooctyl)phosphonate (10).

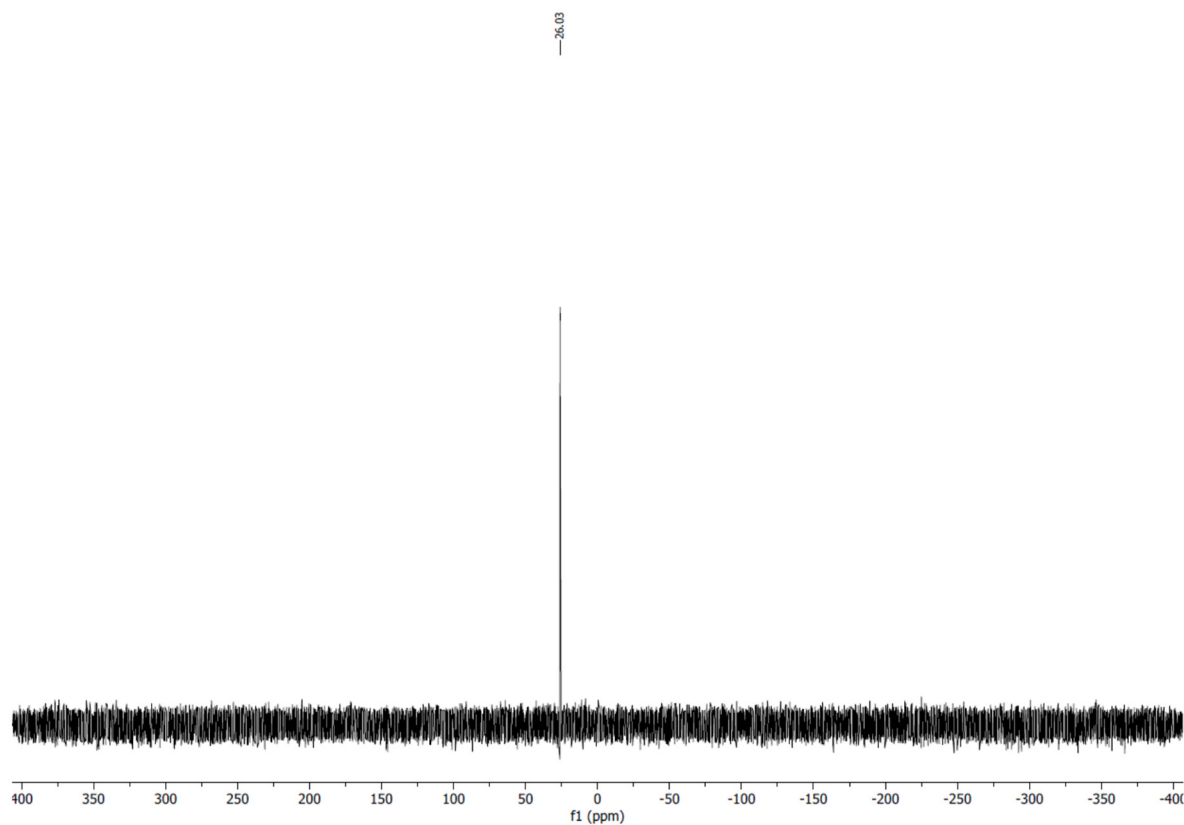

**Figure S30.**  $^{31}\text{P}$  NMR (162 MHz,  $\text{CDCl}_3$ ) spectra of dimethyl (2,2-dicyano-1-monooctyl)phosphonate (10).

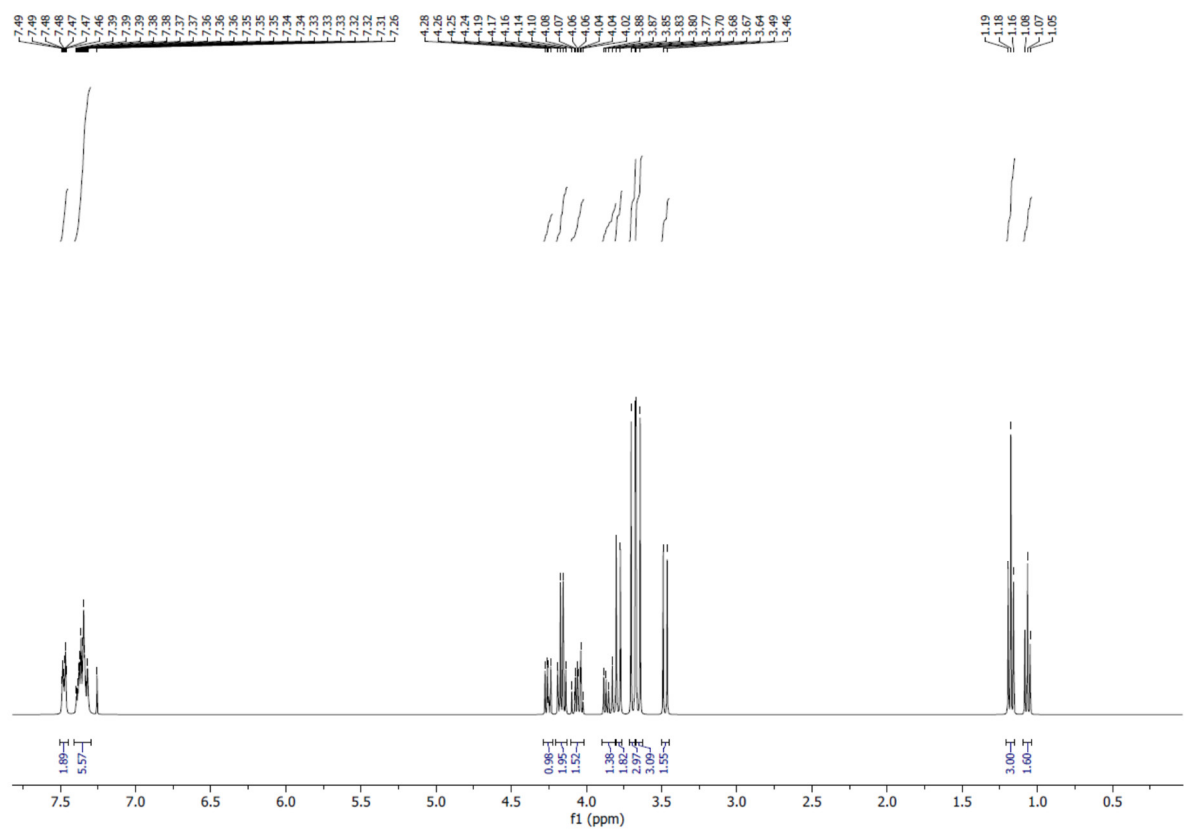

**Figure S31.**  $^1\text{H}$  NMR (400 MHz,  $\text{CDCl}_3$ ) spectra of 2-cyano-3-(dimethoxy-phosphoryl)-3-phenyl-propionic acid ethyl ester (11).



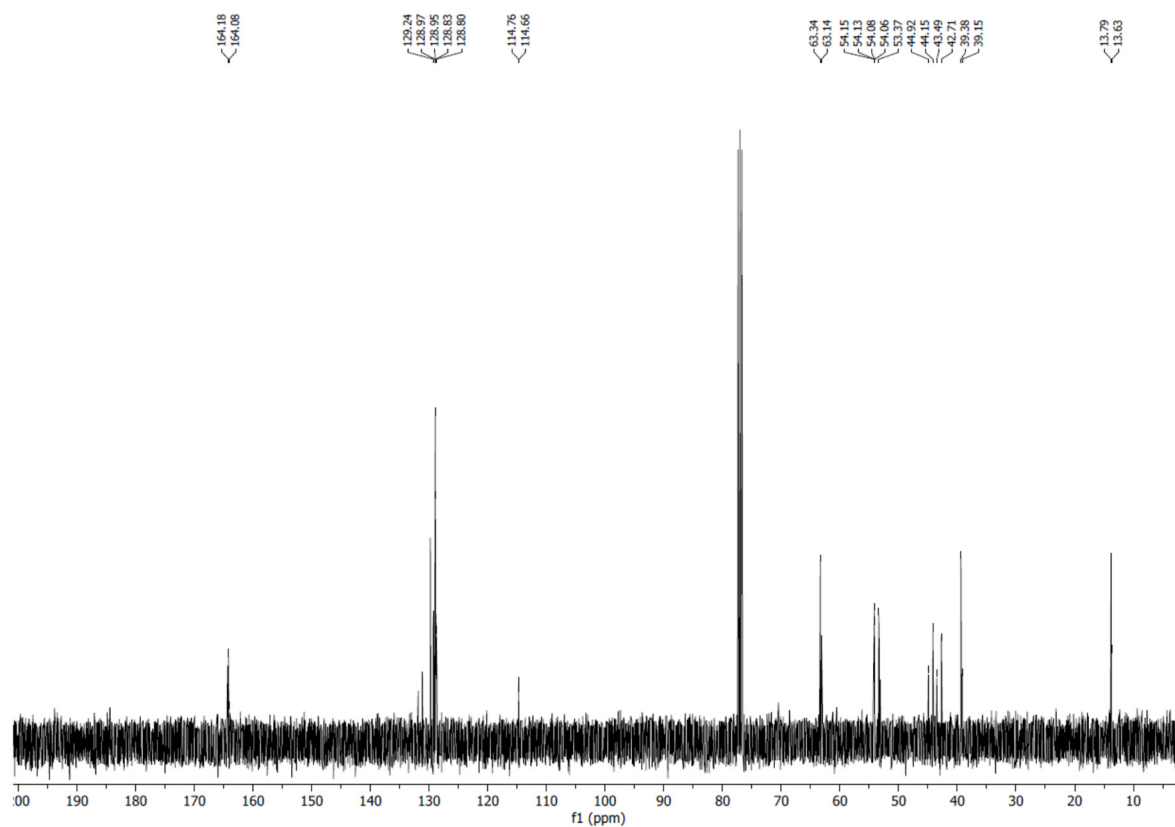

**Figure S32.**  $^{13}\text{C}$  NMR (100 MHz,  $\text{CDCl}_3$ ) spectra of 2-cyano-3-(dimethoxy-phosphoryl)-3-phenylpropionic acid ethyl ester (**11**).

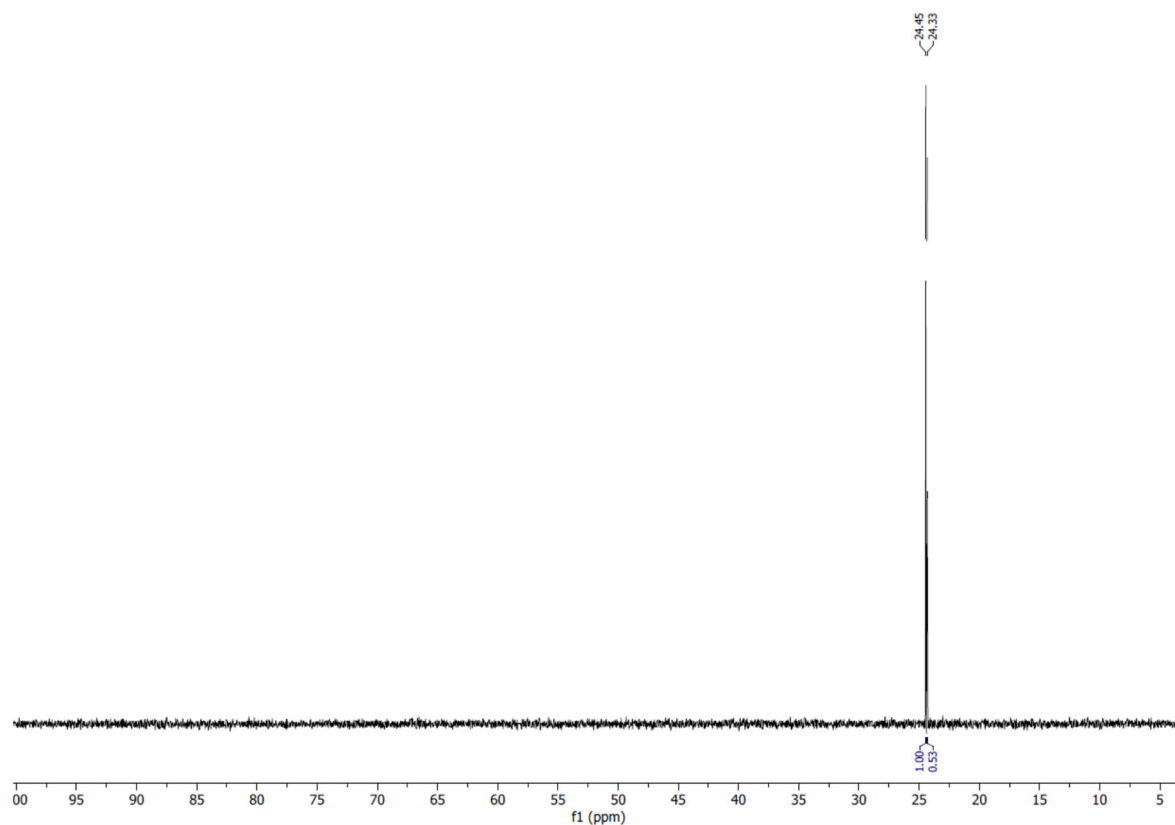

**Figure S33.**  $^{31}\text{P}$  NMR (162 MHz,  $\text{CDCl}_3$ ) spectra of 2-cyano-3-(dimethoxy-phosphoryl)-3-phenylpropionic acid ethyl ester (**11**).

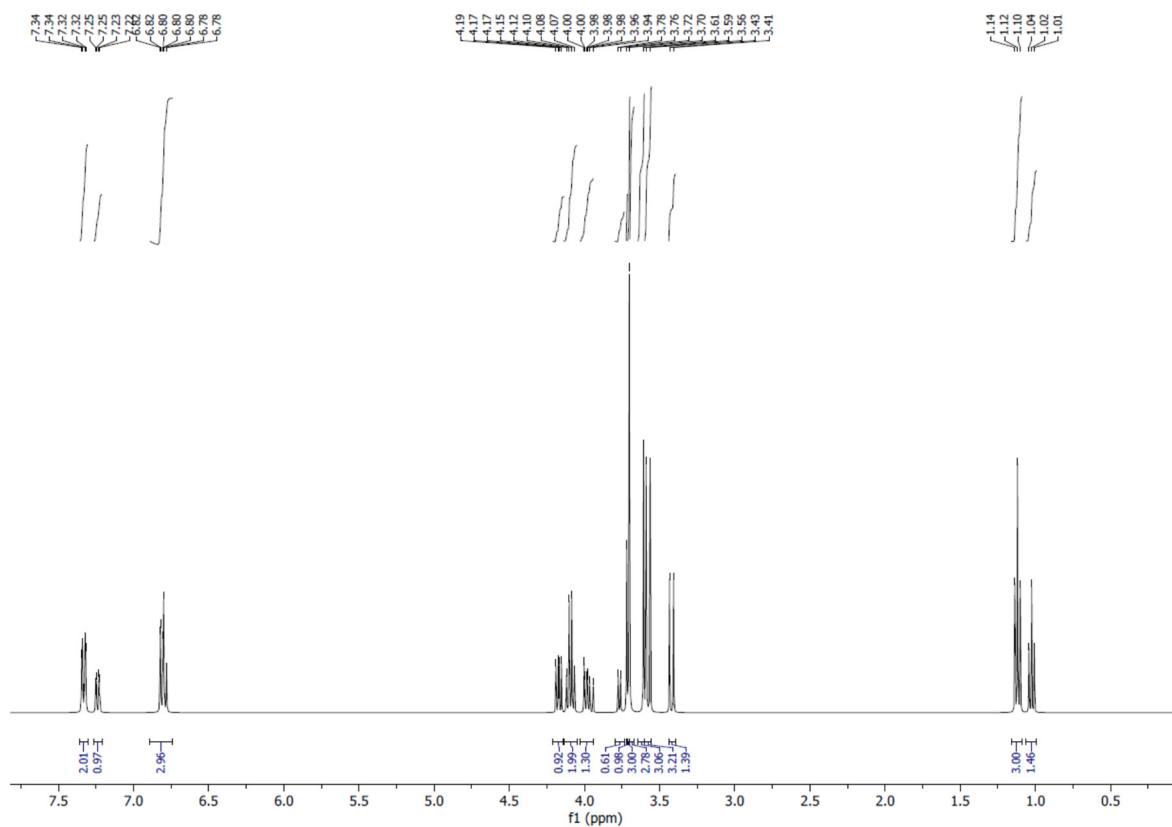

**Figure S34.** <sup>1</sup>H NMR (400 MHz, CDCl<sub>3</sub>) spectra of 2-cyano-3-(dimethoxy-phosphoryl)-3-(4-methoxyphenyl)-propionic acid ethyl ester (12).

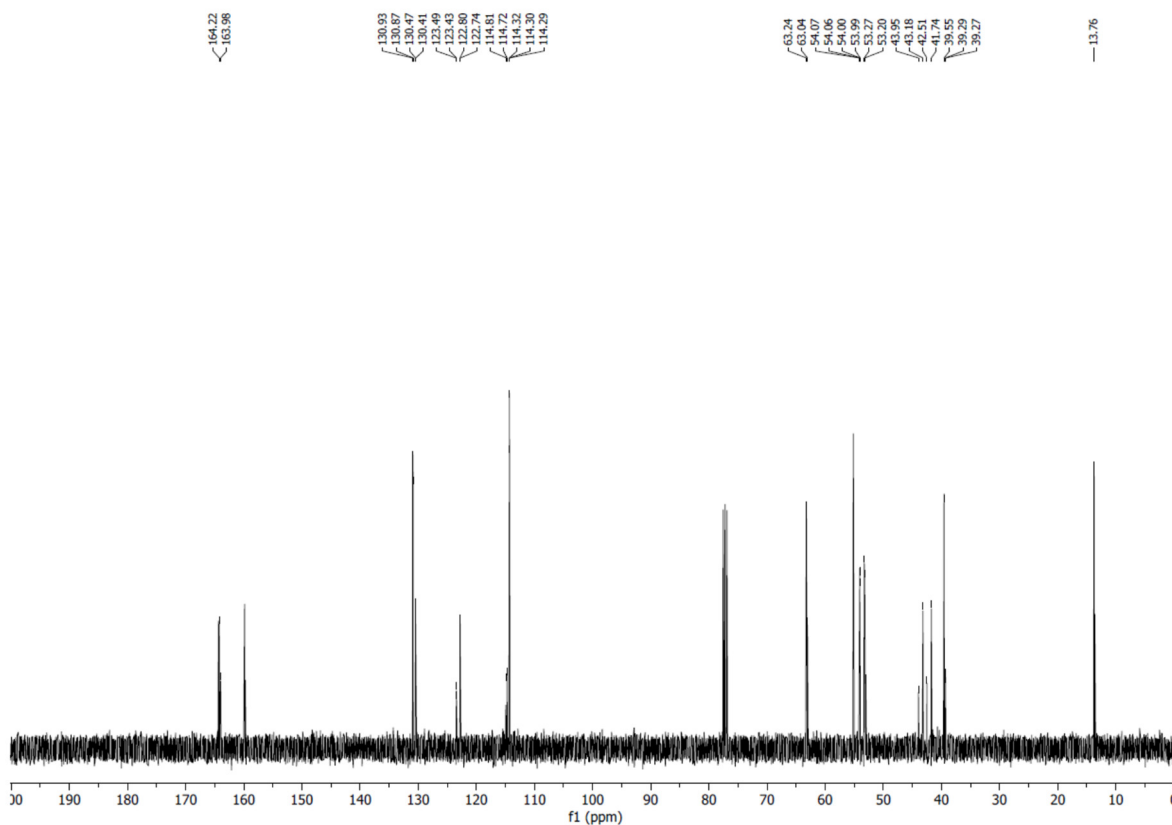

**Figure S35.** <sup>13</sup>C NMR (100 MHz, CDCl<sub>3</sub>) spectra of 2-cyano-3-(dimethoxy-phosphoryl)-3-(4-methoxyphenyl)-propionic acid ethyl ester (12).

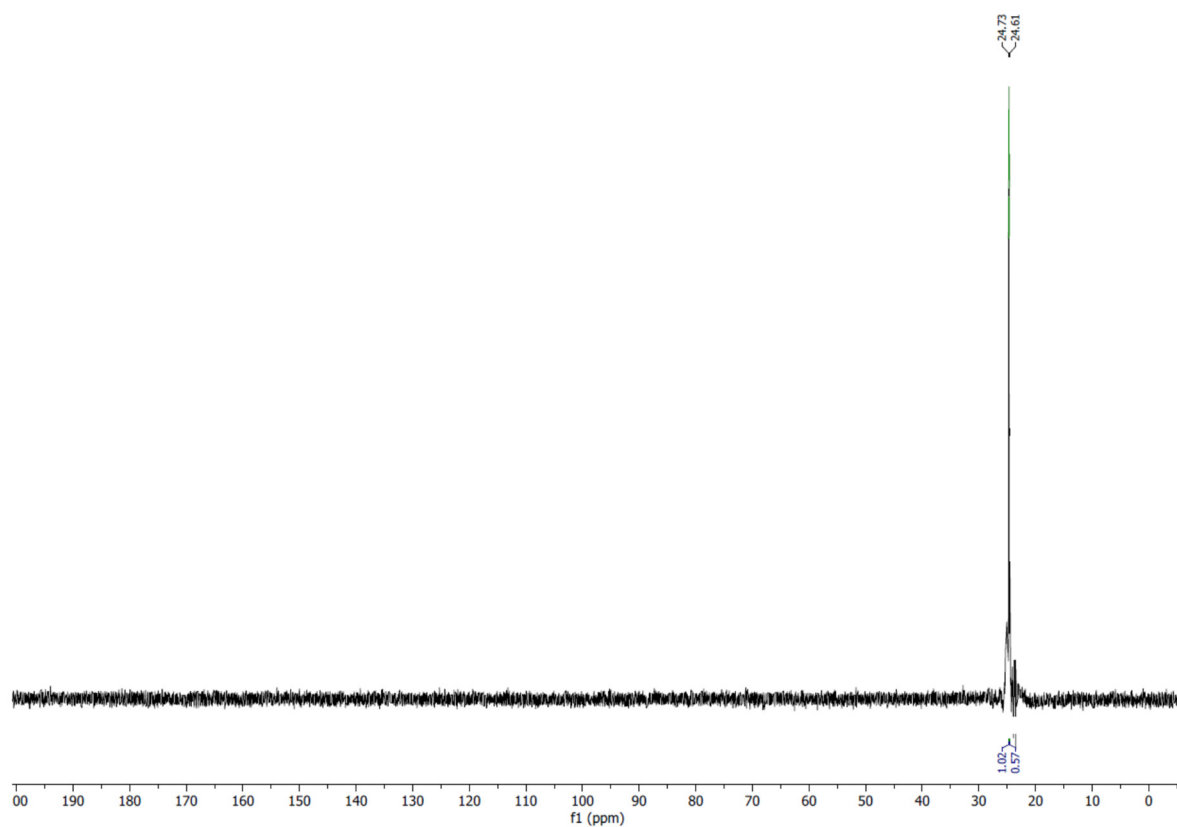

**Figure S36.** <sup>31</sup>P NMR (162 MHz, CDCl<sub>3</sub>) spectra of 2-cyano-3-(dimethoxy-phosphoryl)-3-(4-methoxyphenyl)-propionic acid ethyl ester (12)

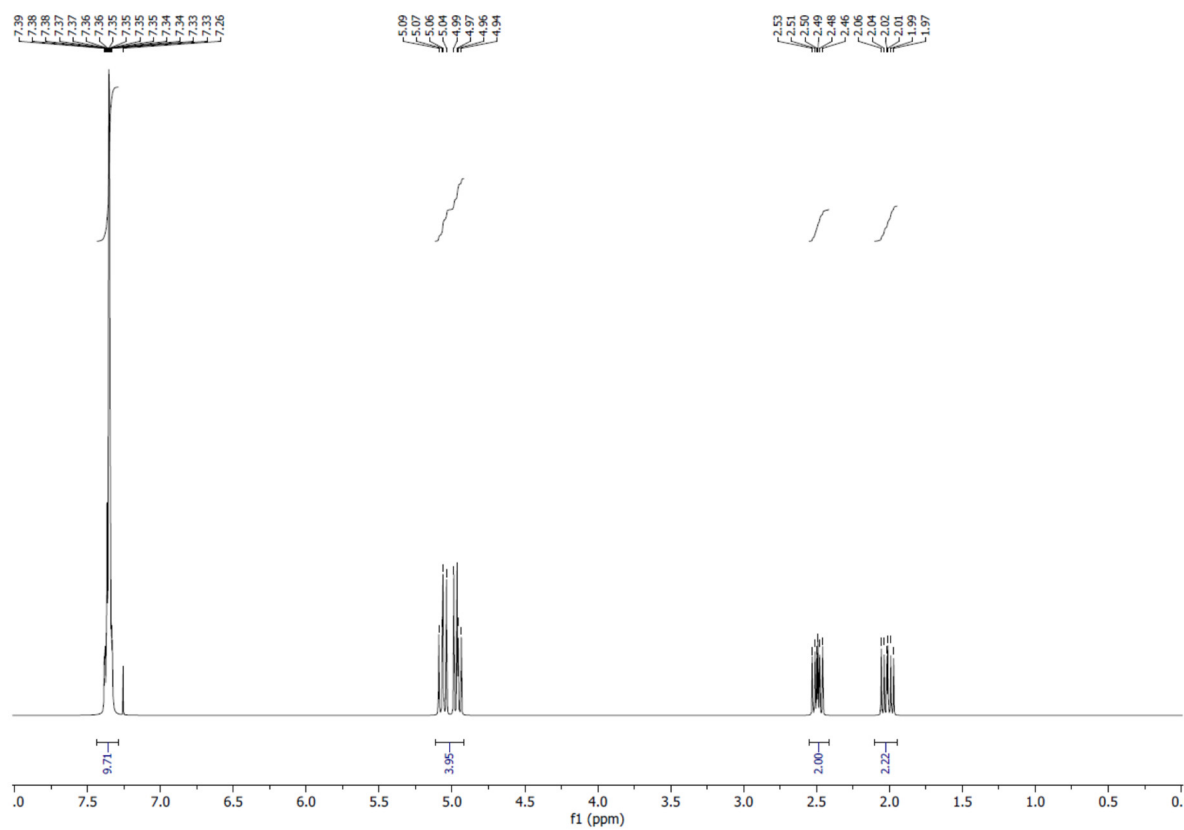

**Figure S37.** <sup>1</sup>H NMR (400 MHz, CDCl<sub>3</sub>) spectra of dibenzyl (2-cyanoethyl)phosphonate (13).

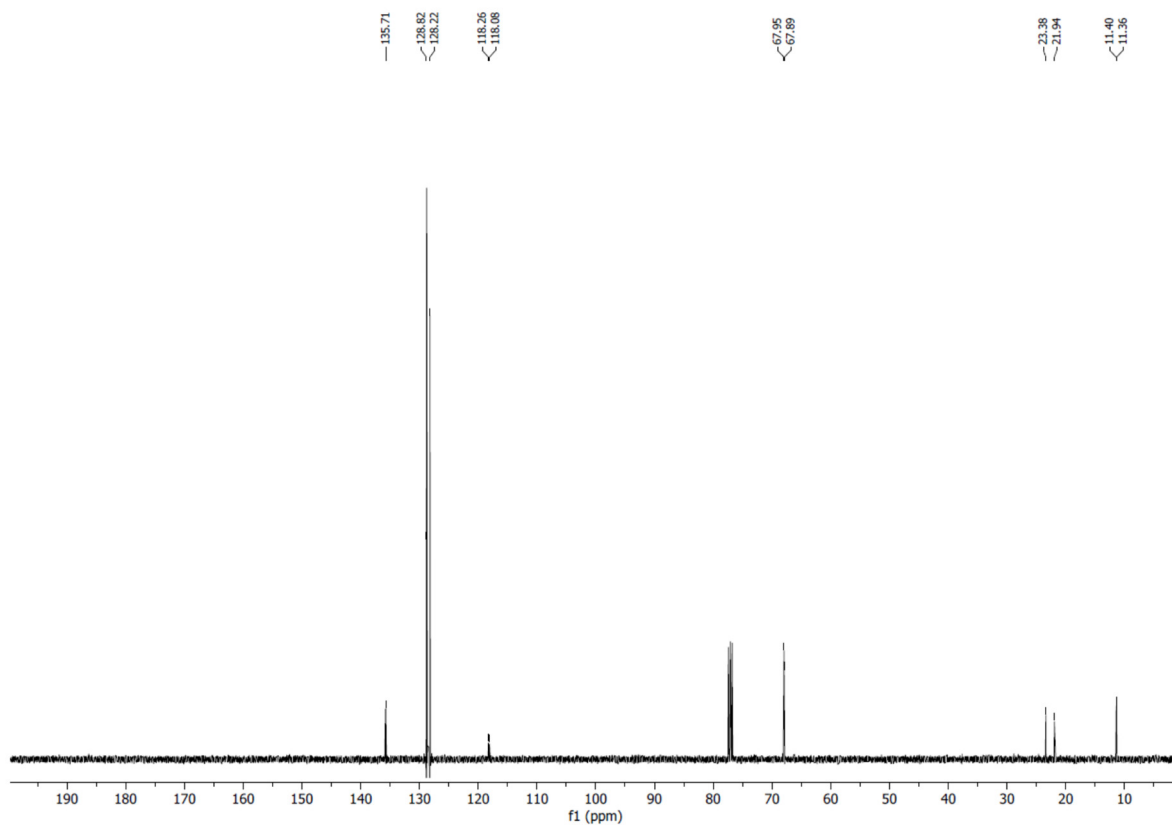

**Figure S38.**  $^{13}\text{C}$  NMR (100 MHz,  $\text{CDCl}_3$ ) spectra of dibenzyl (2-cyanoethyl)phosphonate (**13**).

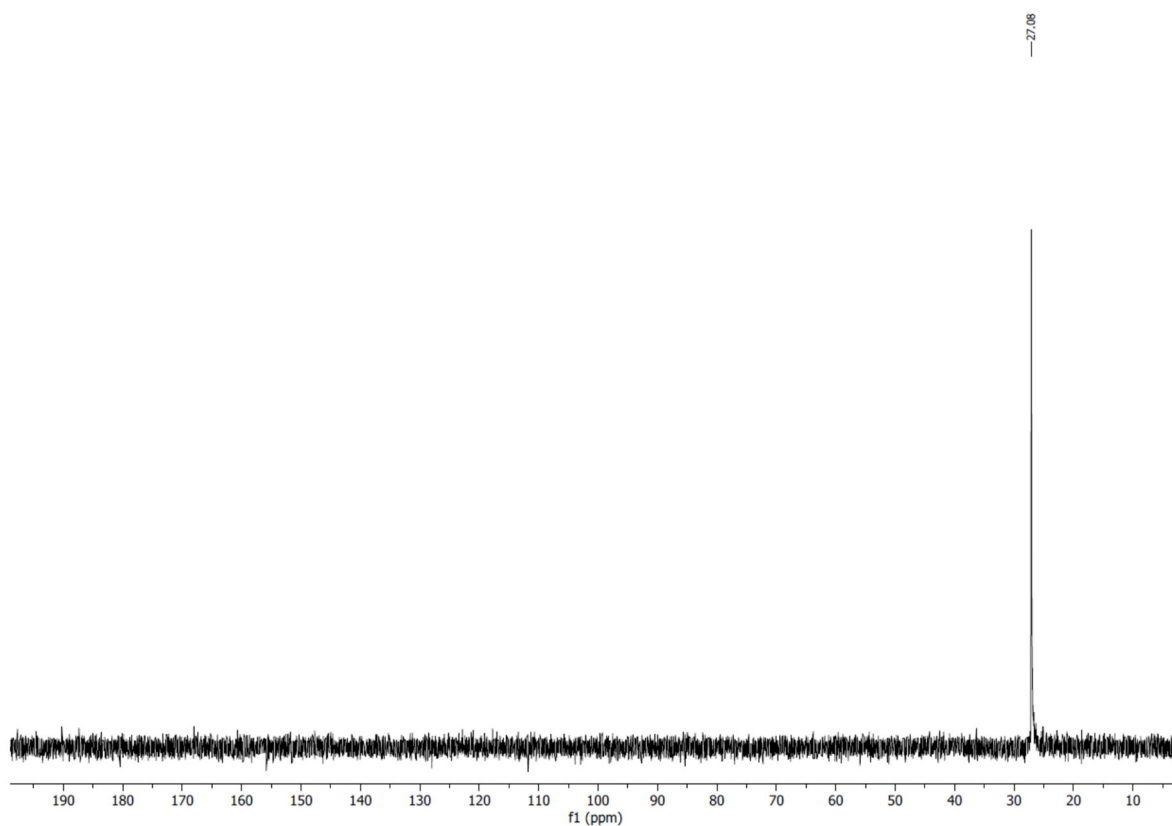

**Figure S39.**  $^{31}\text{P}$  NMR (162 MHz,  $\text{CDCl}_3$ ) spectra of dibenzyl (2-cyanoethyl)phosphonate (**13**).

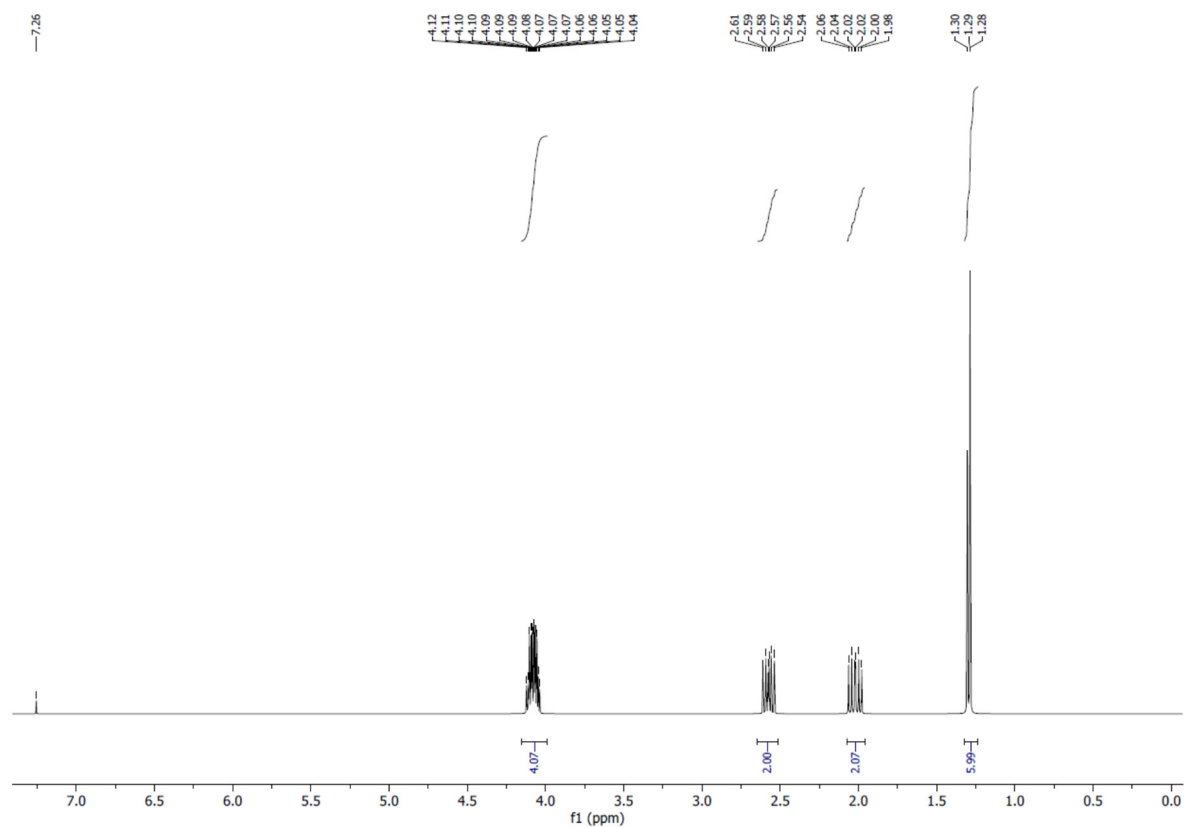

**Figure S40.** <sup>1</sup>H NMR (400 MHz, CDCl<sub>3</sub>) spectra of diethyl (2-cyanoethyl)phosphonate (**14**).

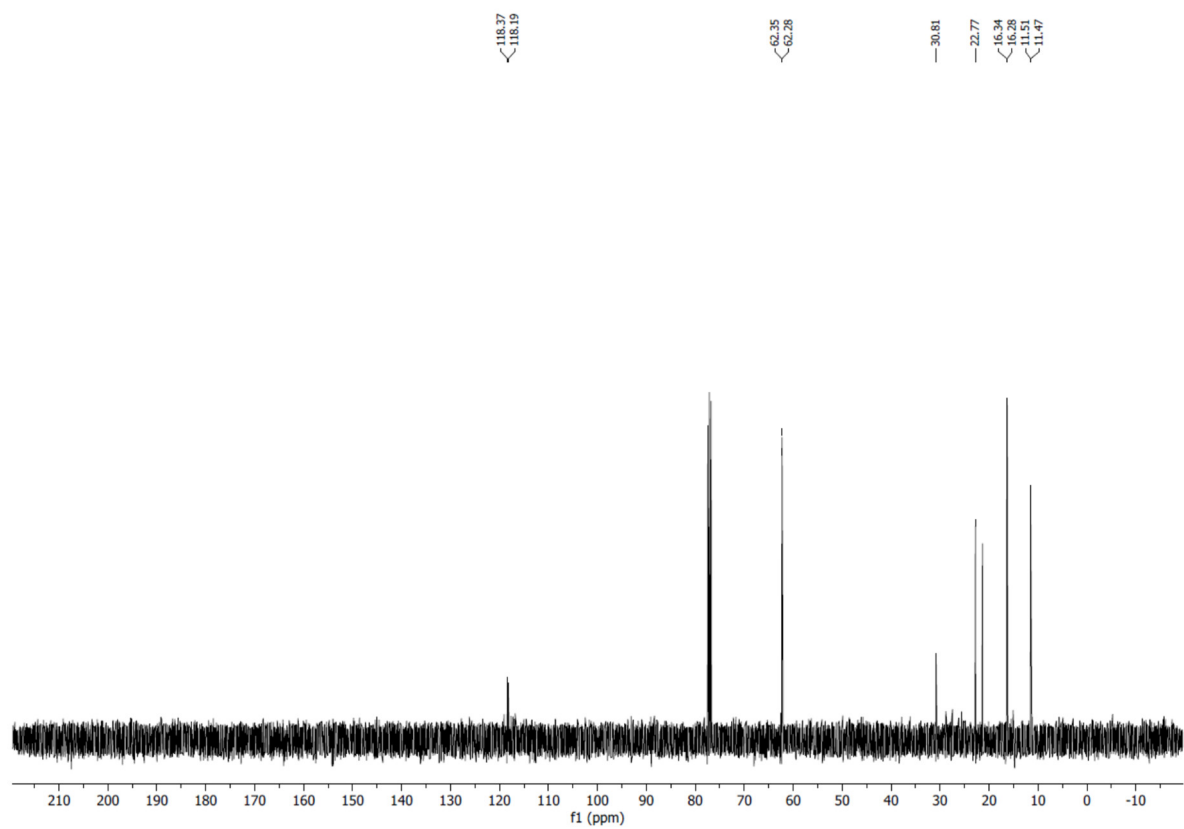

**Figure S41.** <sup>13</sup>C NMR (400 MHz, CDCl<sub>3</sub>) spectra of diethyl (2-cyanoethyl)phosphonate (**14**).

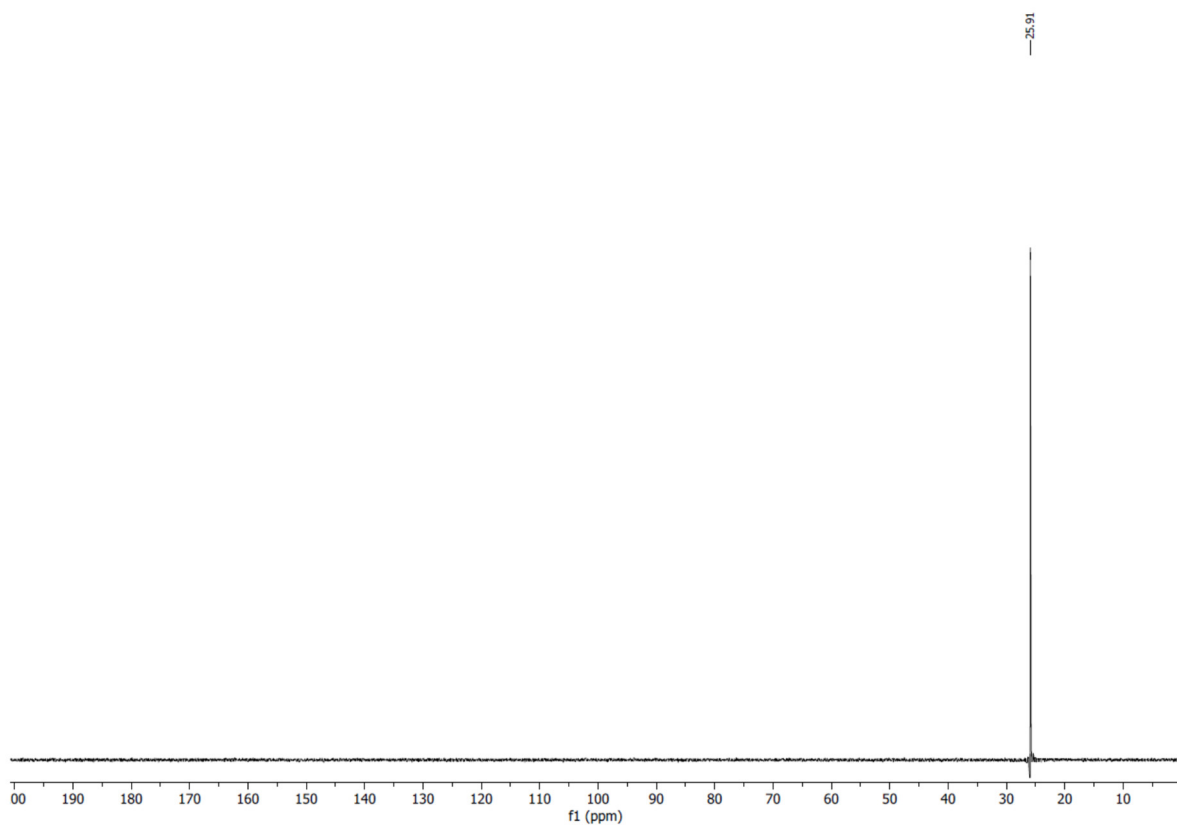

**Figure S42.**  $^{31}\text{P}$  NMR (162 MHz,  $\text{CDCl}_3$ ) spectra of diethyl (2-cyanoethyl)phosphonate (**14**).

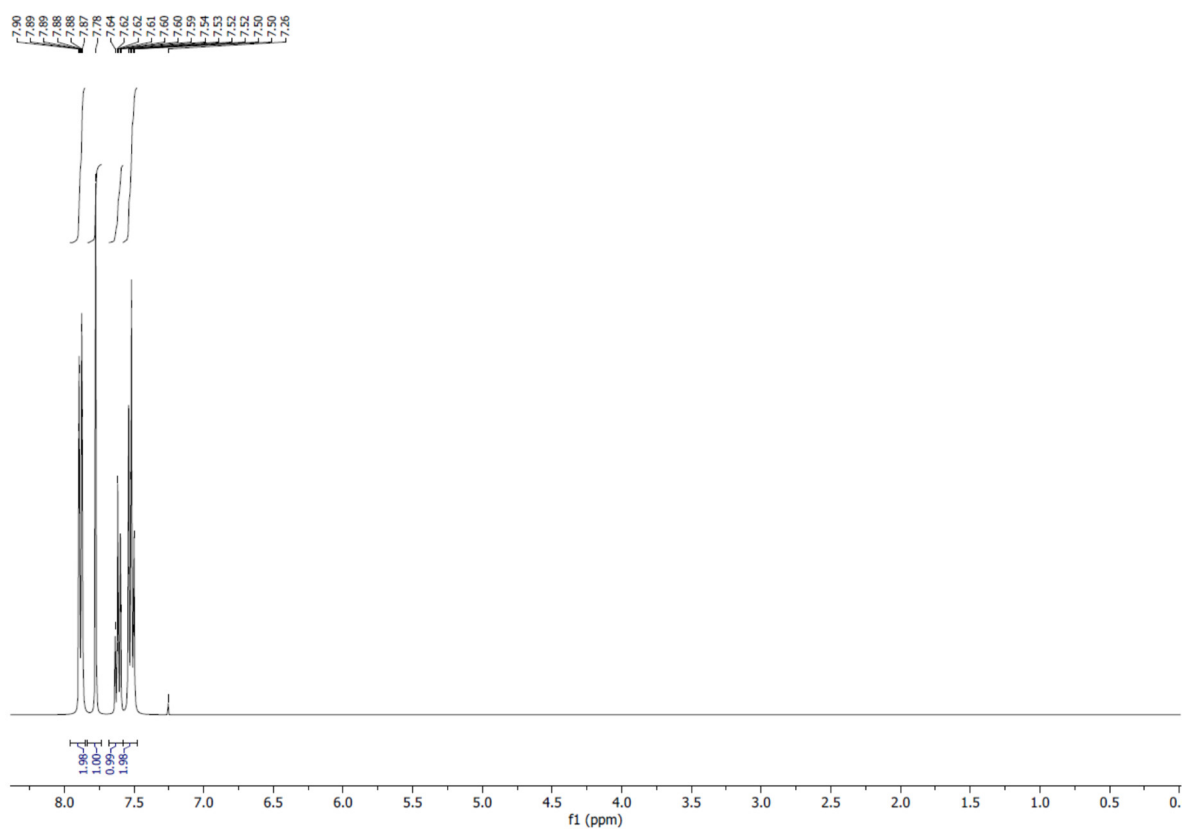

**Figure S43.**  $^1\text{H}$  NMR (400 MHz,  $\text{CDCl}_3$ ) spectra of benzylidenemalononitrile.

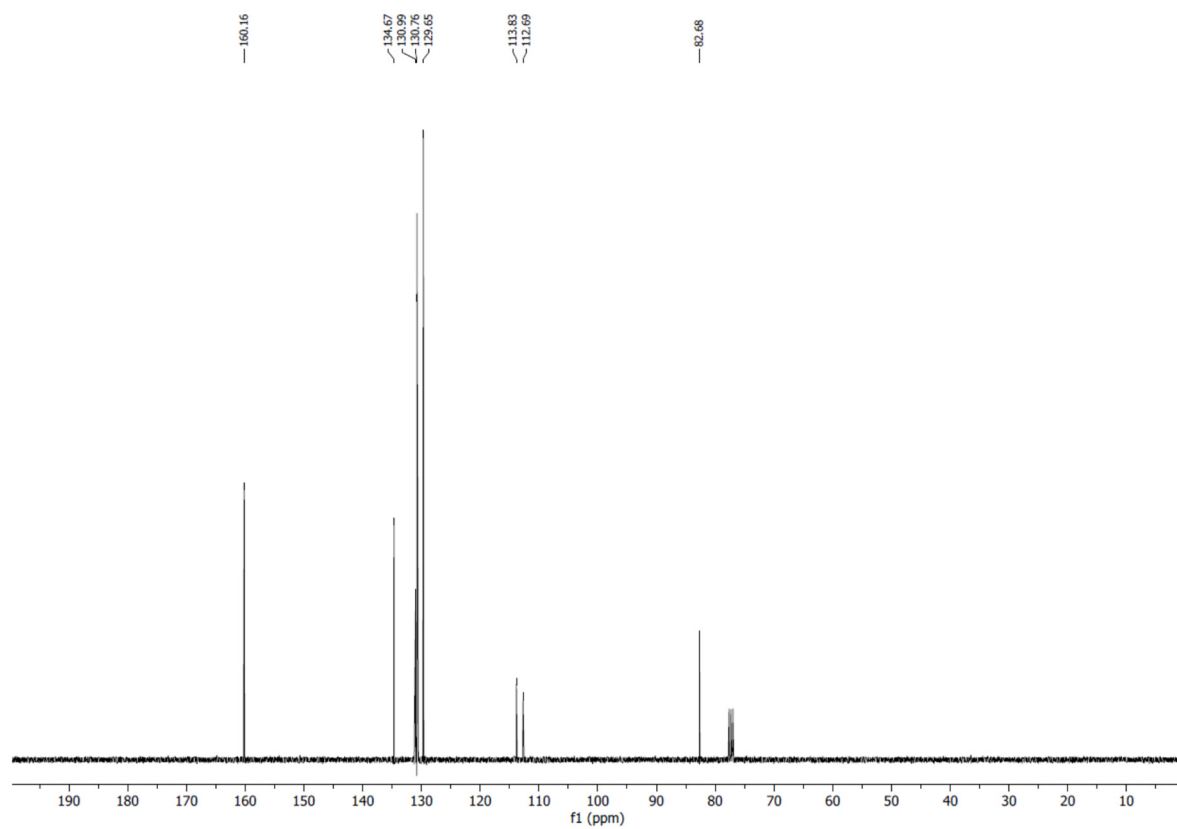

**Figure S44.**  $^{13}\text{C}$  NMR (100 MHz,  $\text{CDCl}_3$ ) spectra of benzylidenemalononitrile.
